# Supplementary material
Source: ML conference proceedings conference paper supplement (https://openreview.net/forum?id=rXFRvcp8E6)

**x = Std self-report, y = Std slide valence**  
**Subject 4, LPA\_Slide**

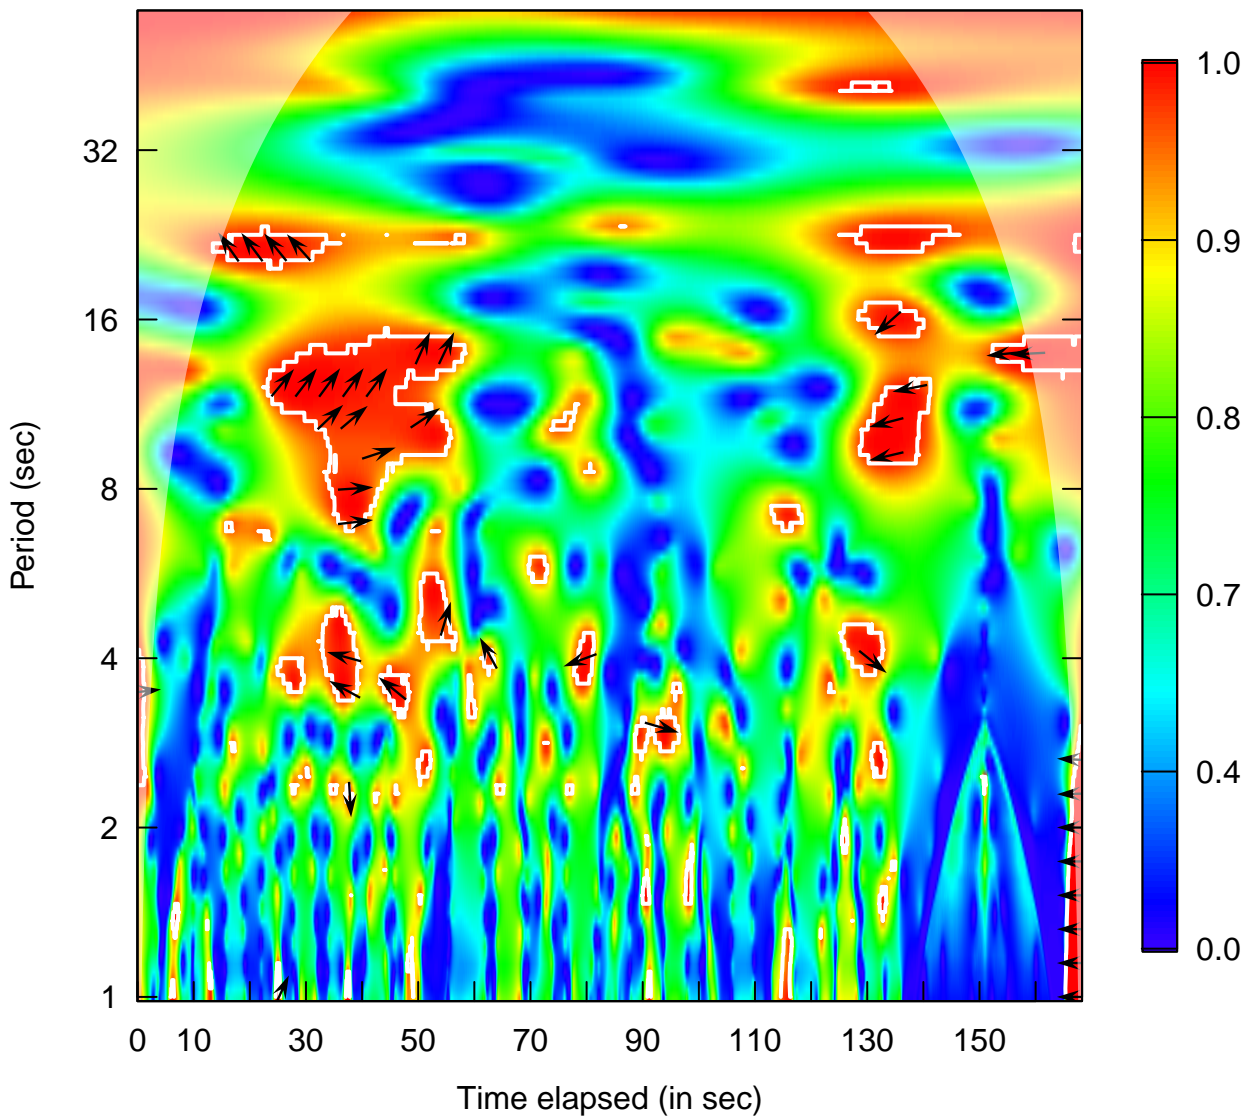

Supplement: supplementary_material [file attachment]

# Subject 4

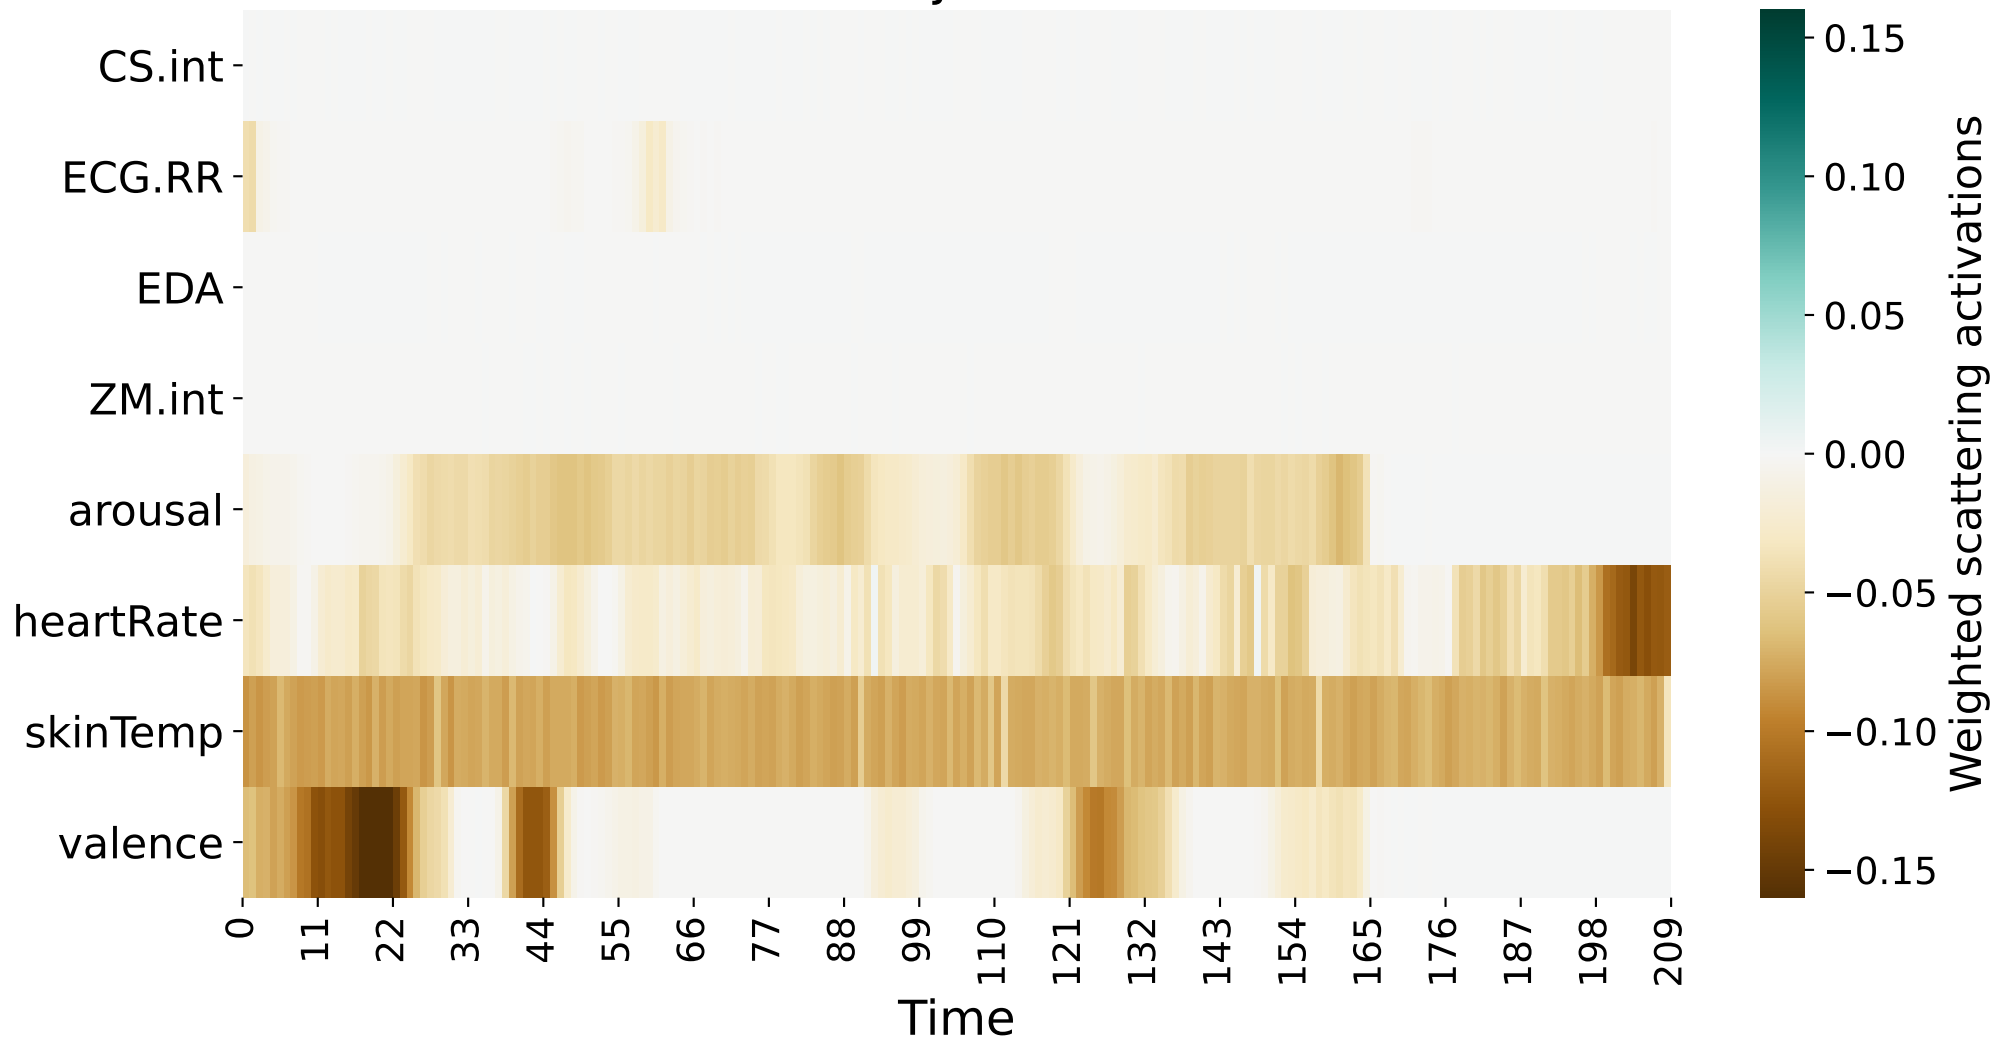

Supplement: supplementary_material [file attachment]

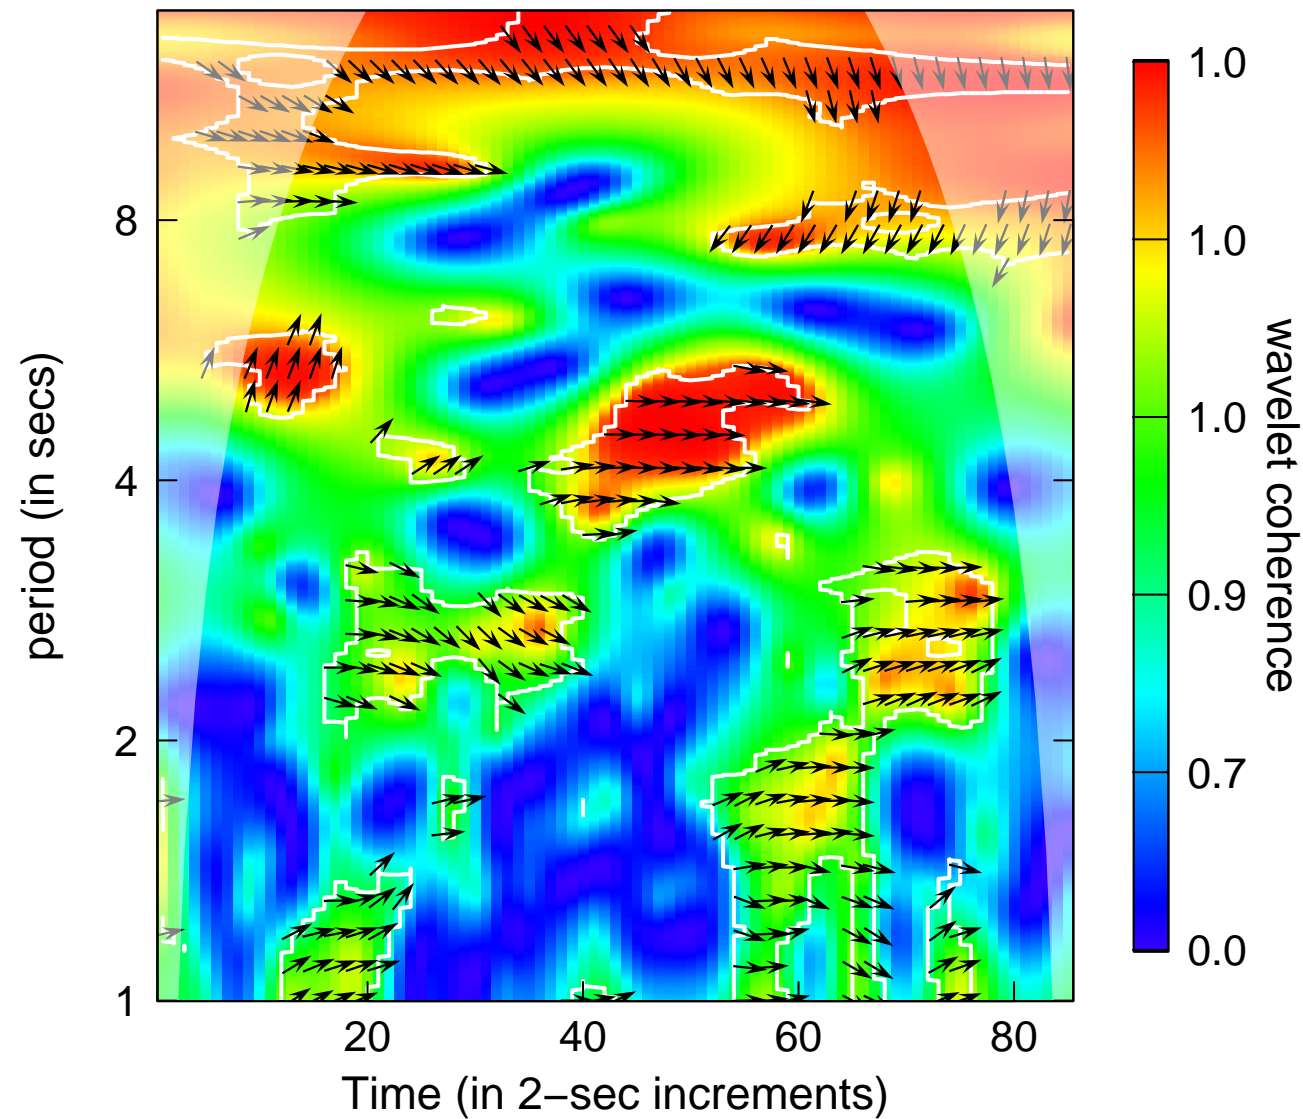

Supplement: supplementary_material [file attachment]

# Slide valence for ID = 4, LPA\_Slide

Std self-report and slide valence values

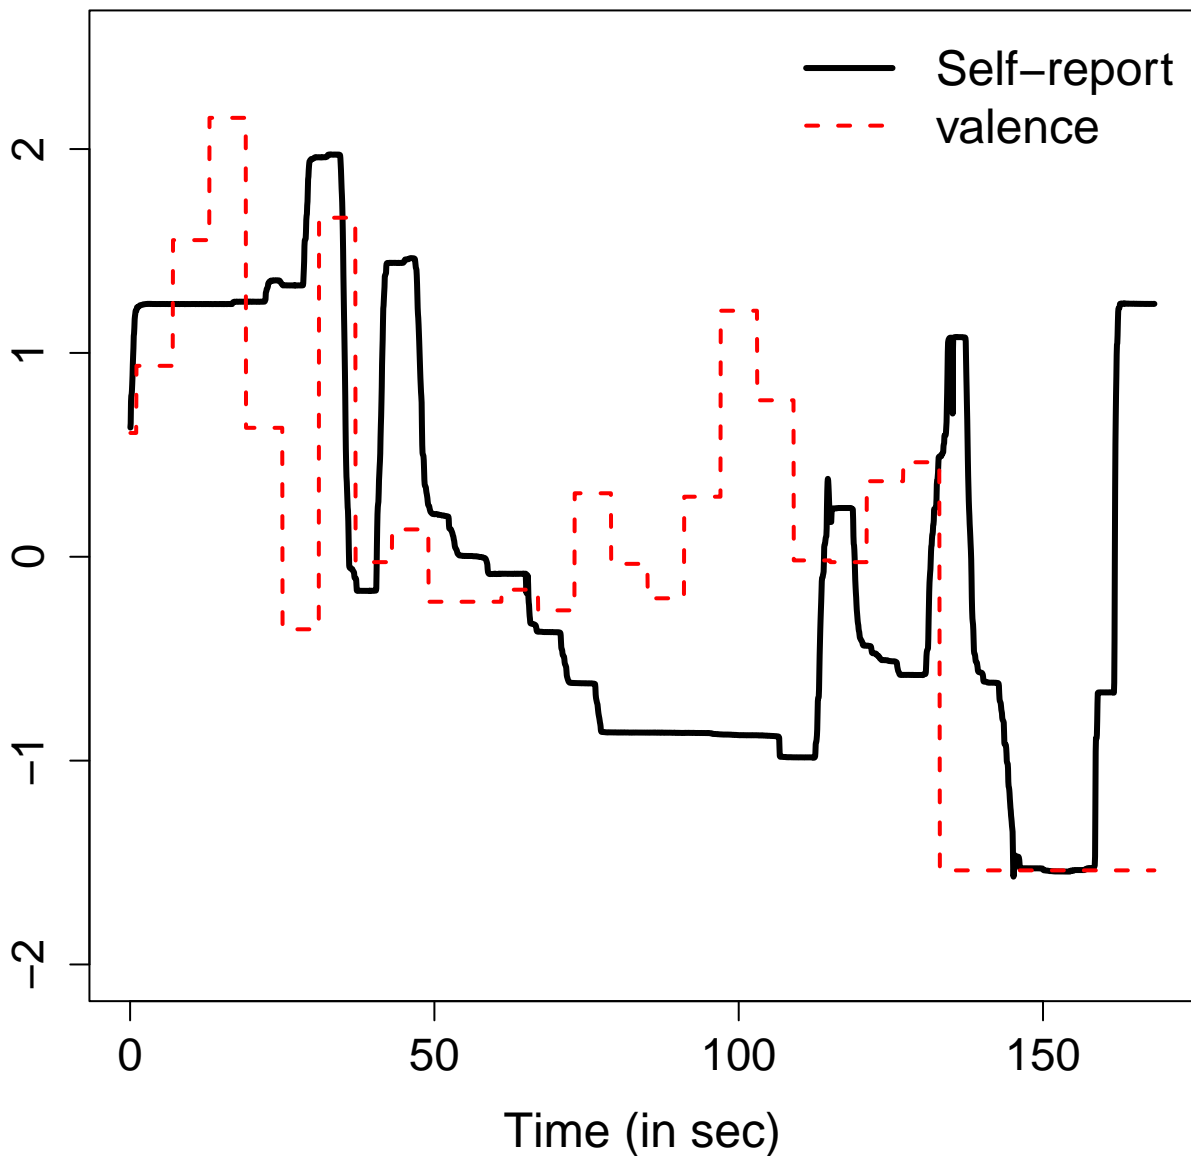

Supplement: supplementary_material [file attachment]

# Subject 14

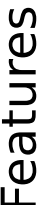

## Weighted scattering activations

Supplement: supplementary_material [file attachment]

# Subject 15

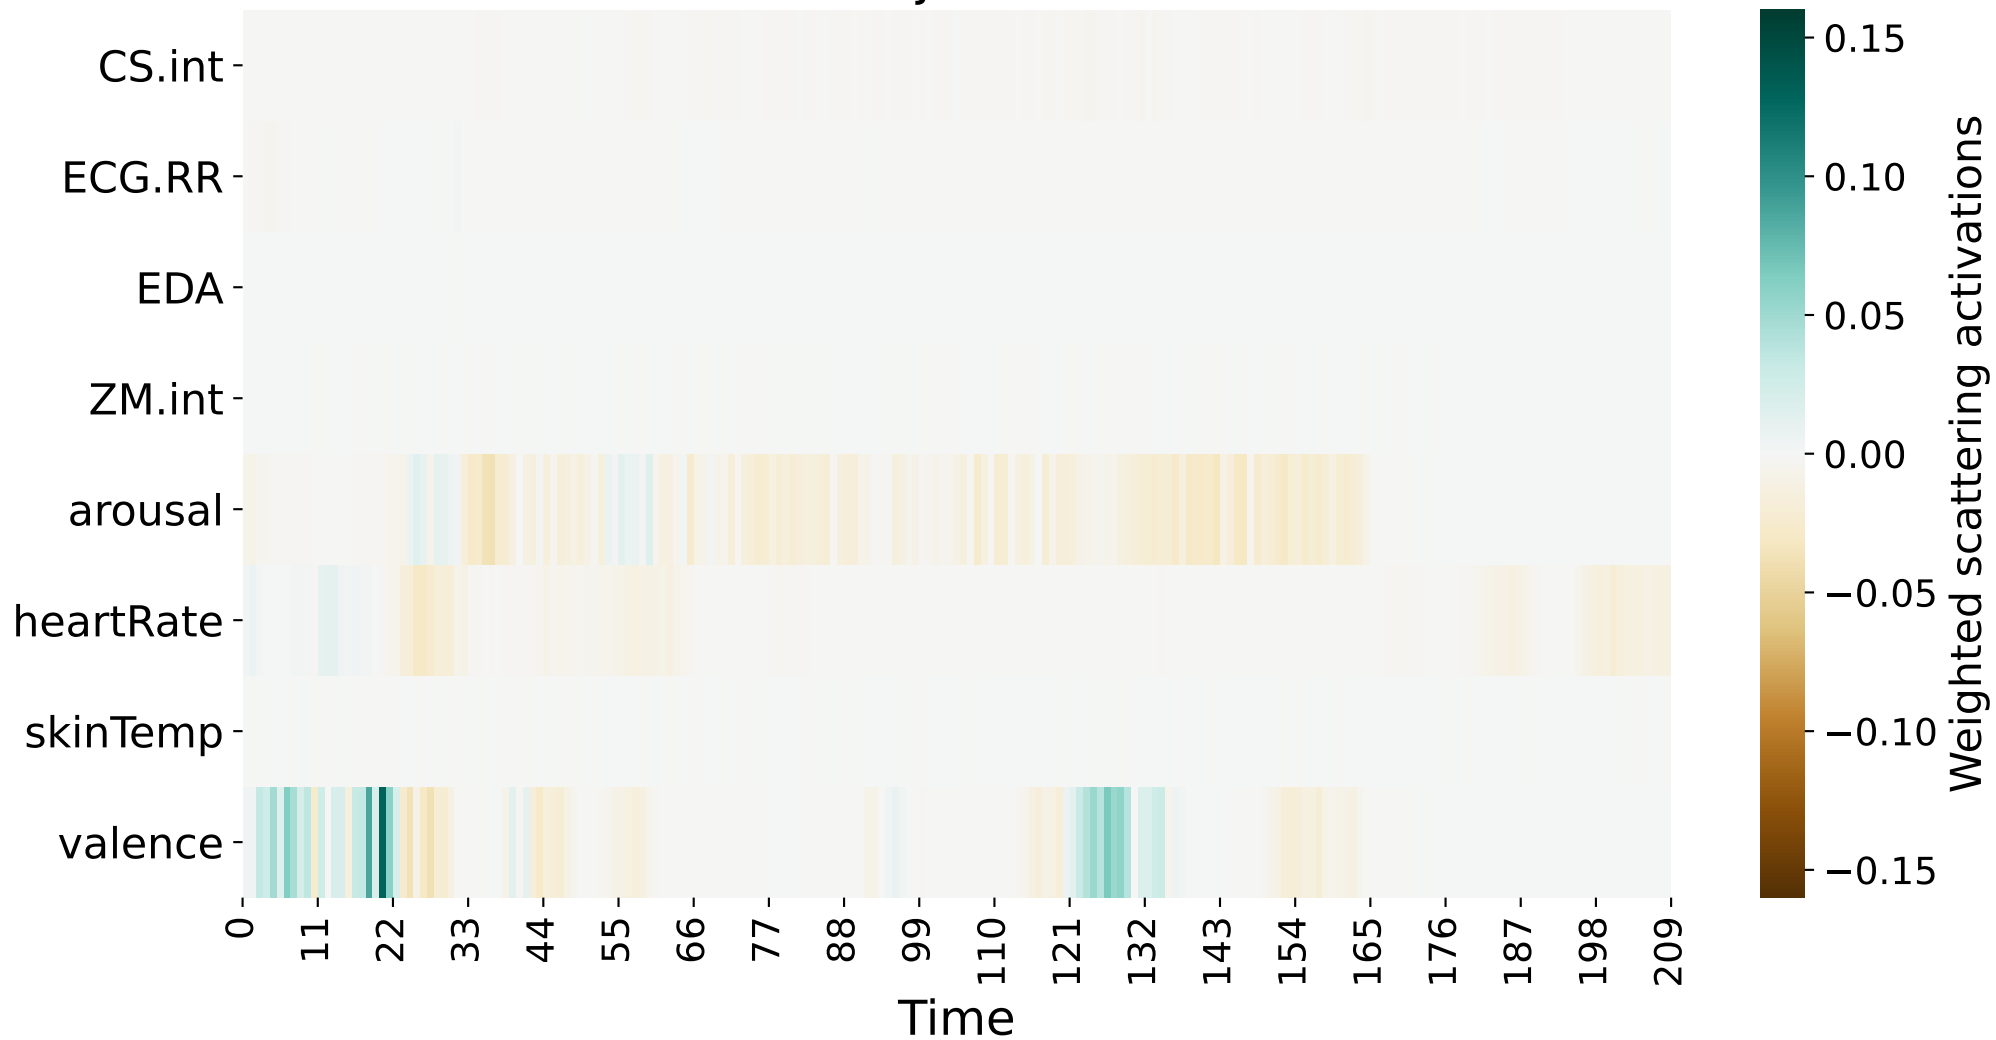

Supplement: supplementary_material [file attachment]

ECG R-R intervals for ID = 4, LPA\_Slide

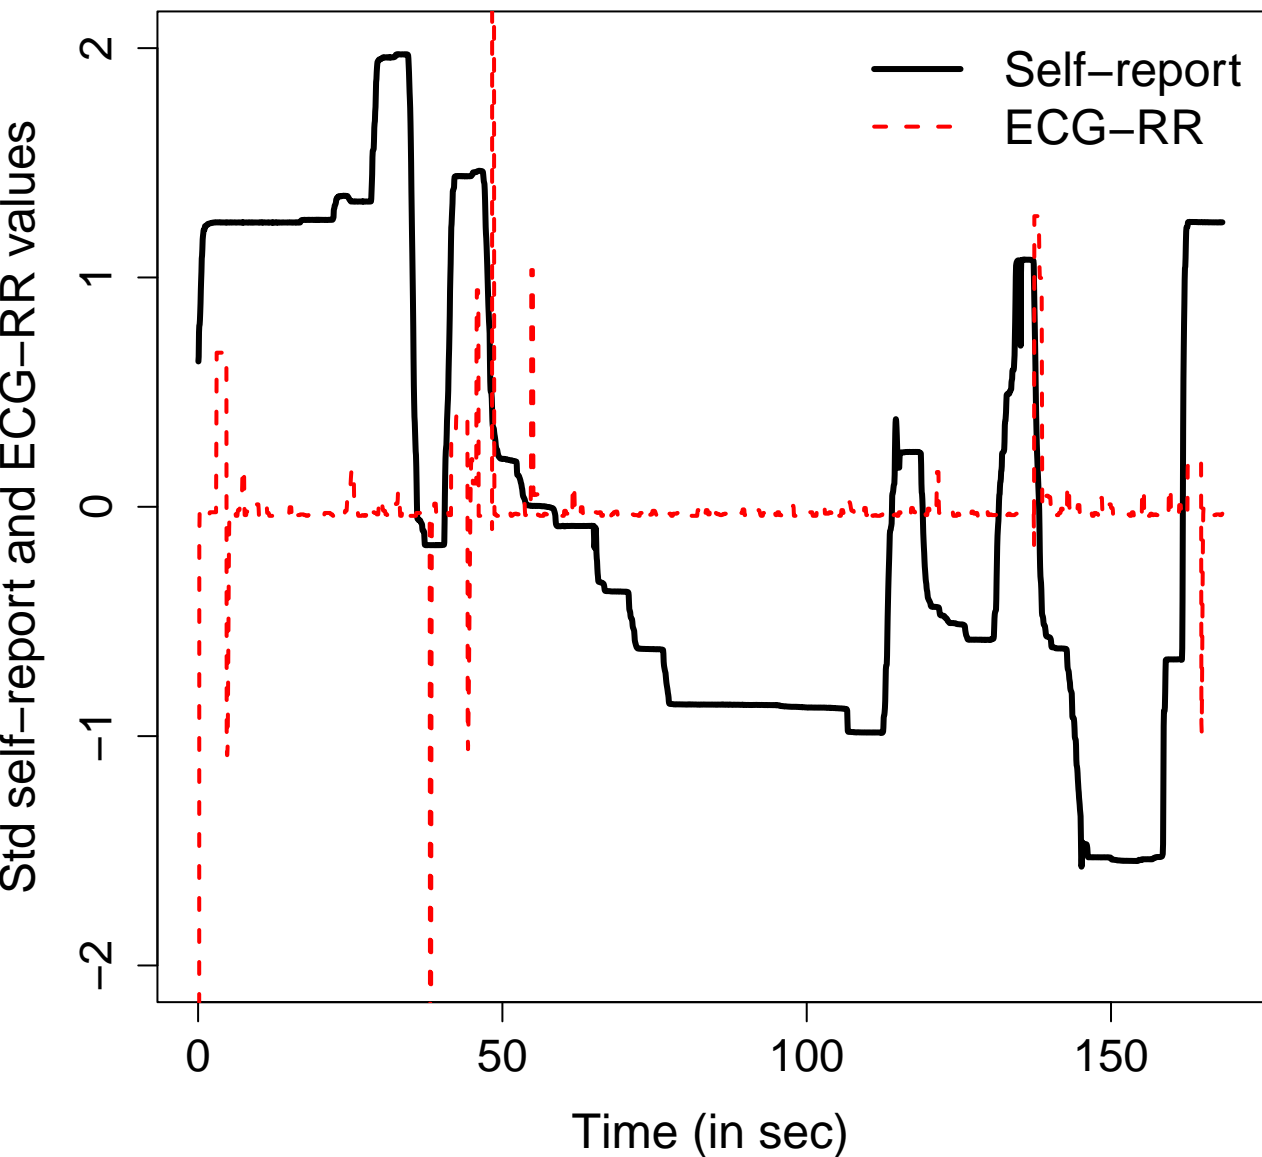

Supplement: supplementary_material [file attachment]

# All participants

Features

CS.int  
ECG.RR  
EDA  
ZM.int  
arousal  
heartRate  
skinTemp  
valence

0 11 22 33 44 55 66 77 88 99 110 121 132 143 154 165 176 187 198 209

Time

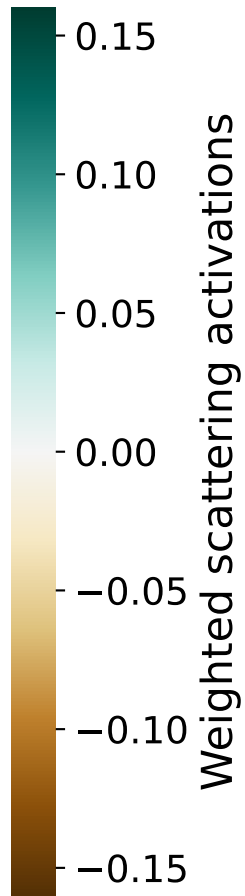

Supplement: supplementary_material [file attachment]

Training Sample 14: Observed vs Predicted

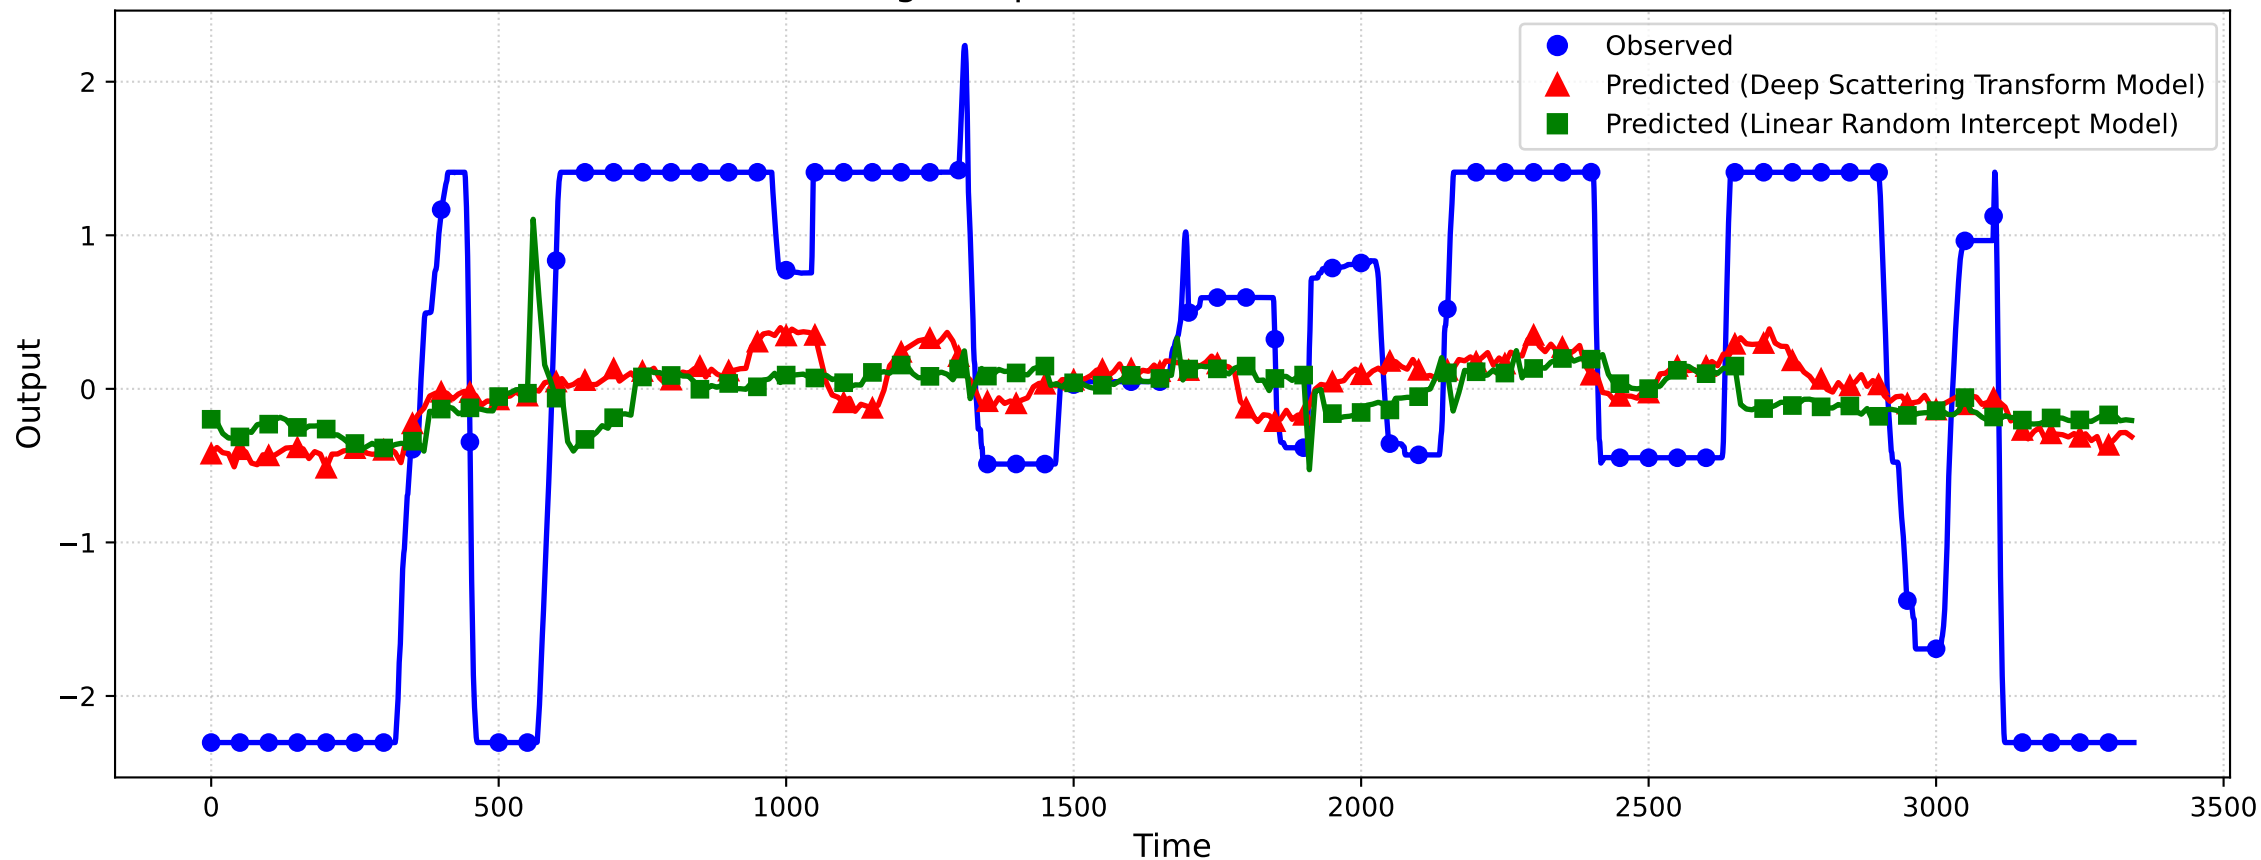

Test Sample 14: Observed vs Predicted

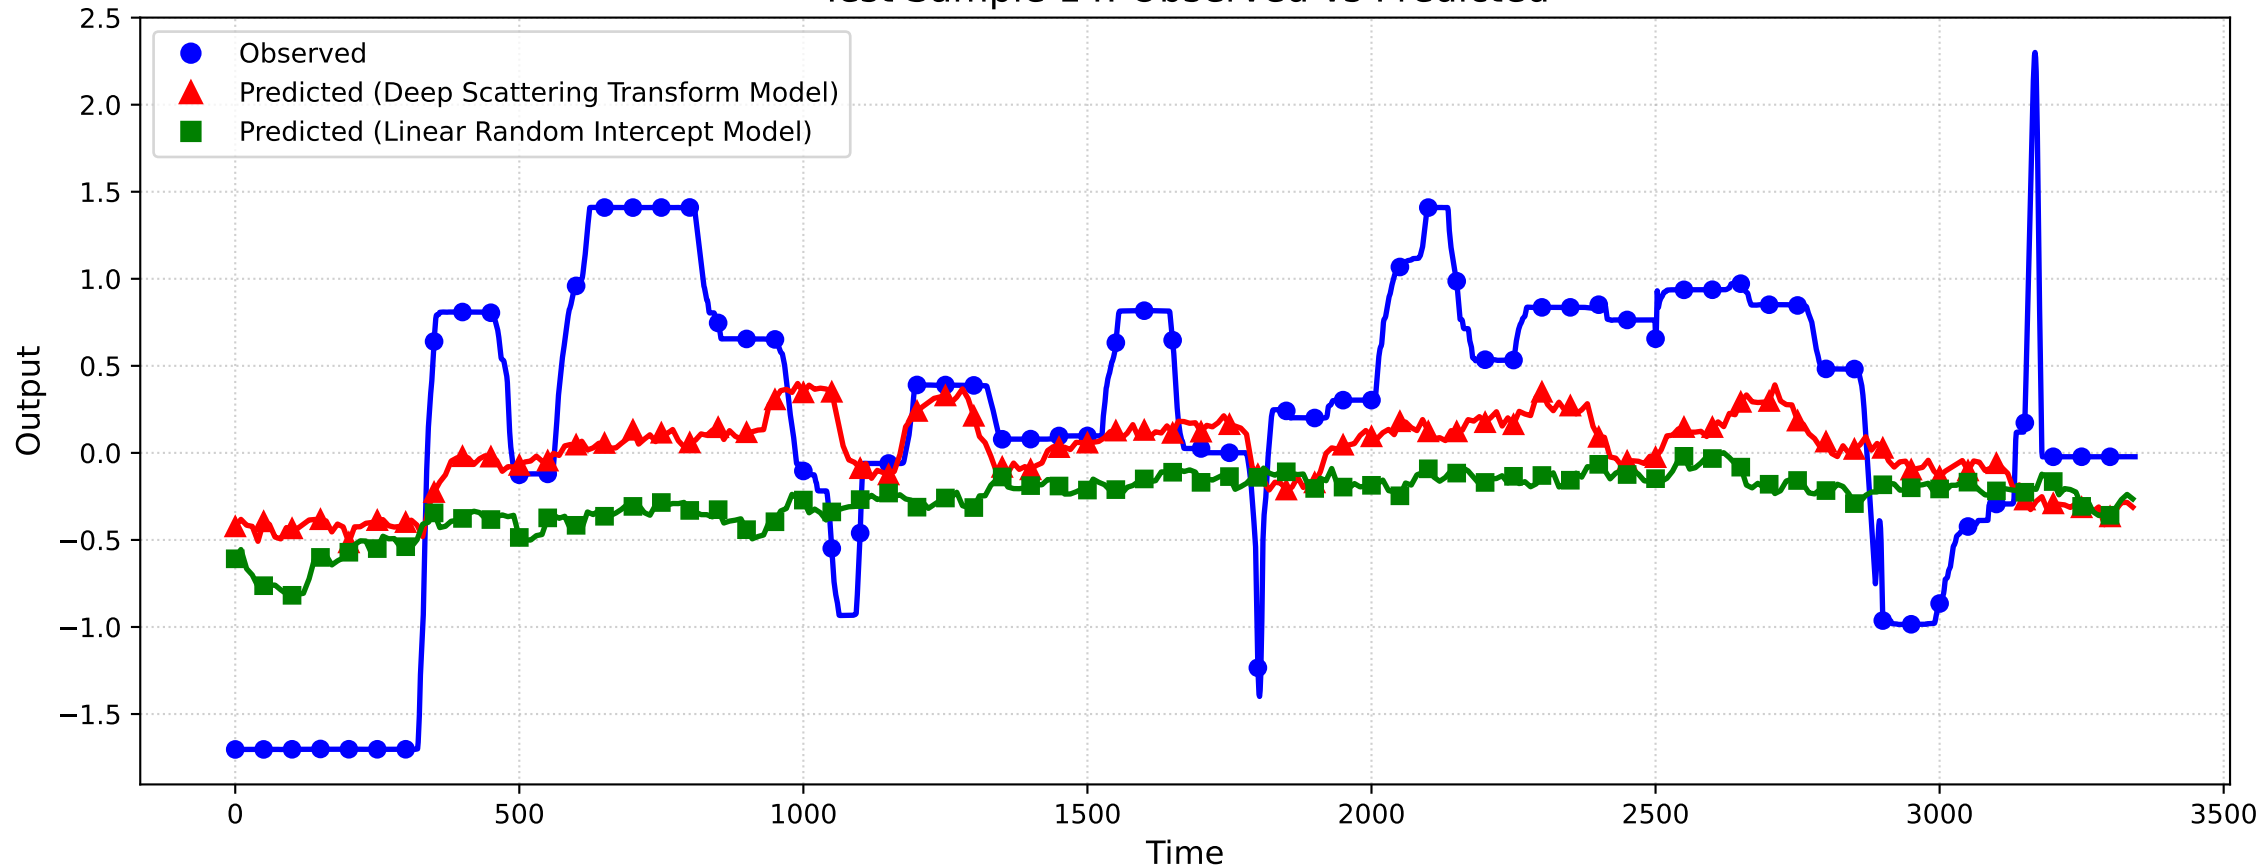

Supplement: supplementary_material [file attachment]

(A) Time Series of Slow Frequency 0.05 Hz with sudden transition to a frequency of 0.2 Hz

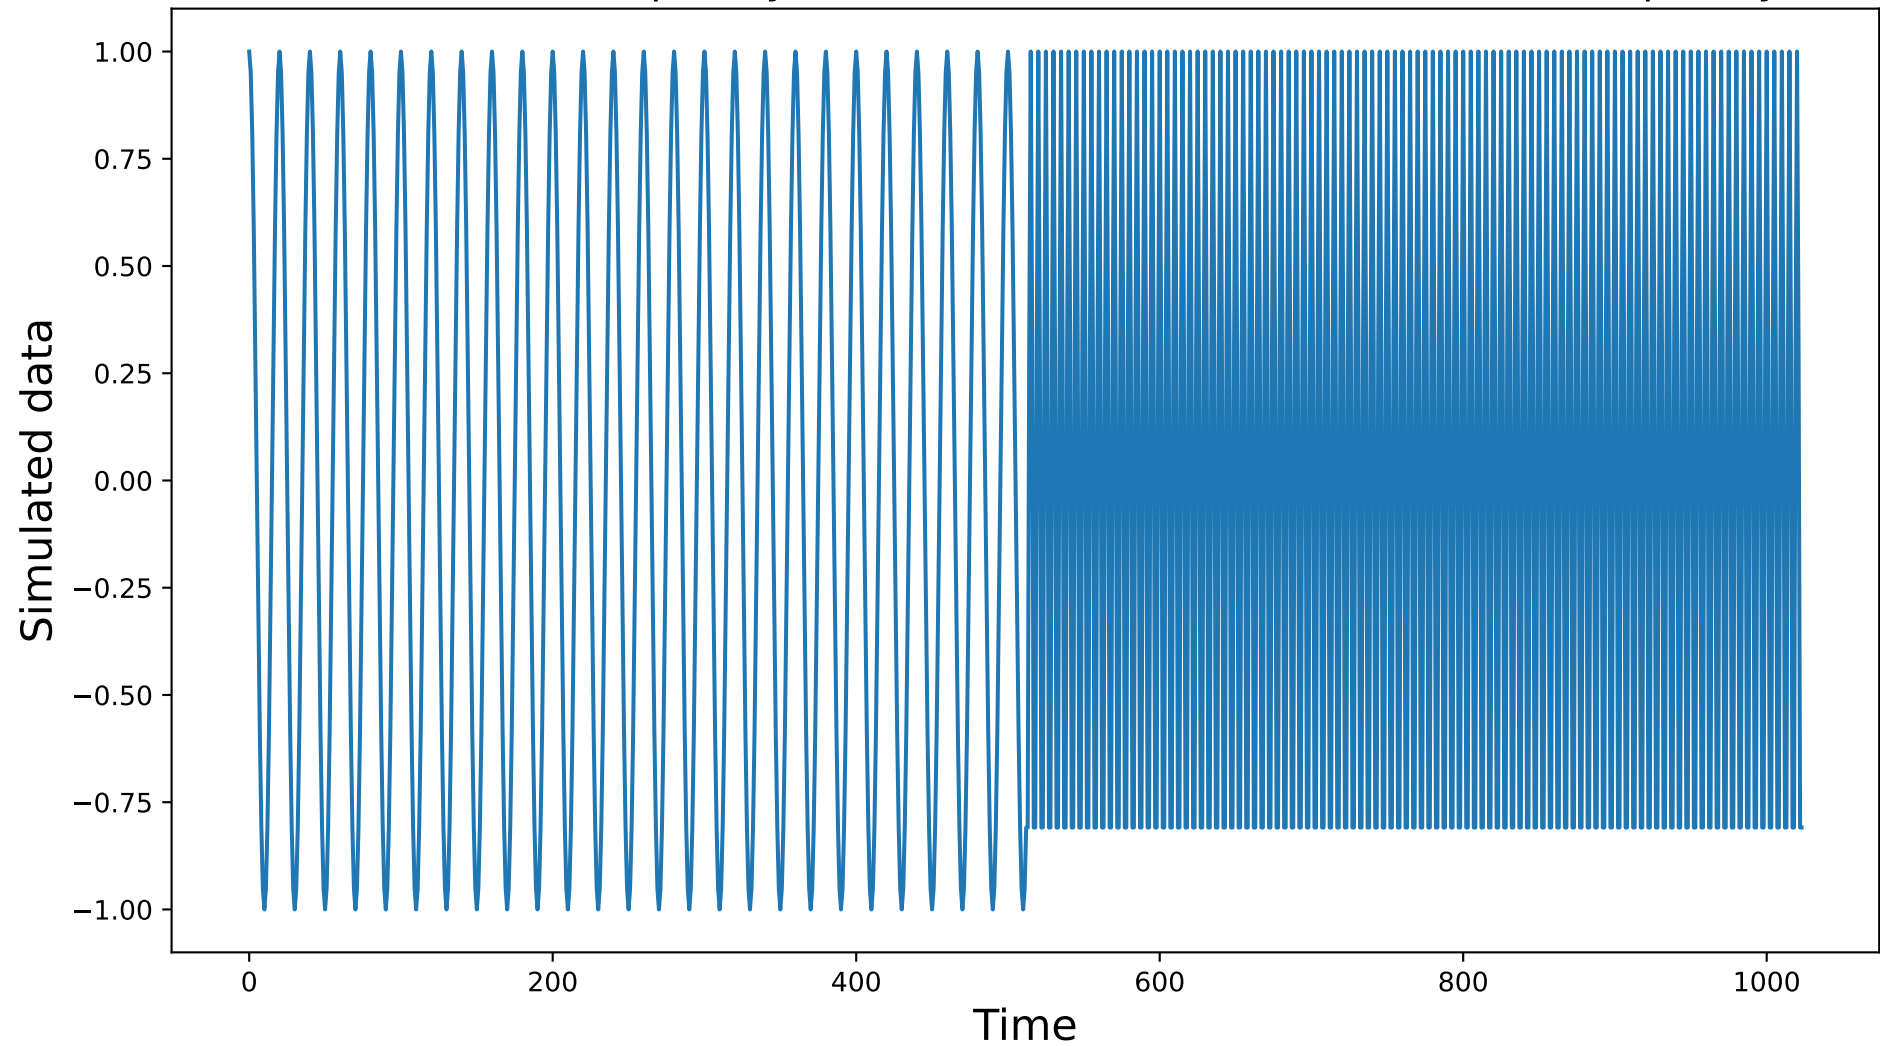

Supplement: supplementary_material [file attachment]

# Slide valence for ID = 4, LPA\_Slide

Std self-report and slide valence values

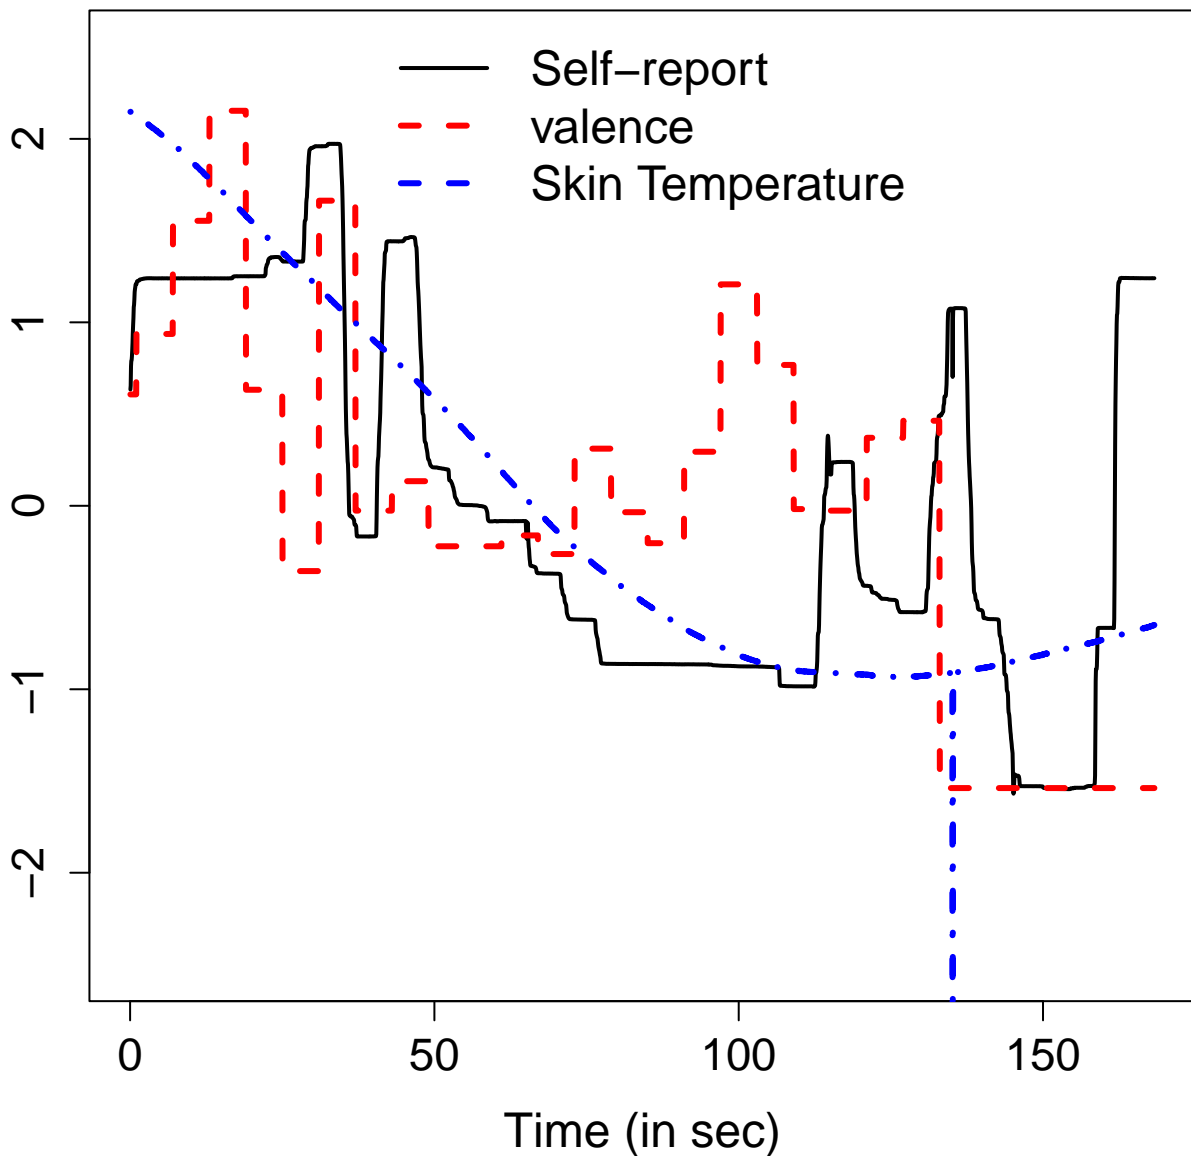

Supplement: supplementary_material [file attachment]

(A) Original Time Series at Frequency of 0.1 Hz

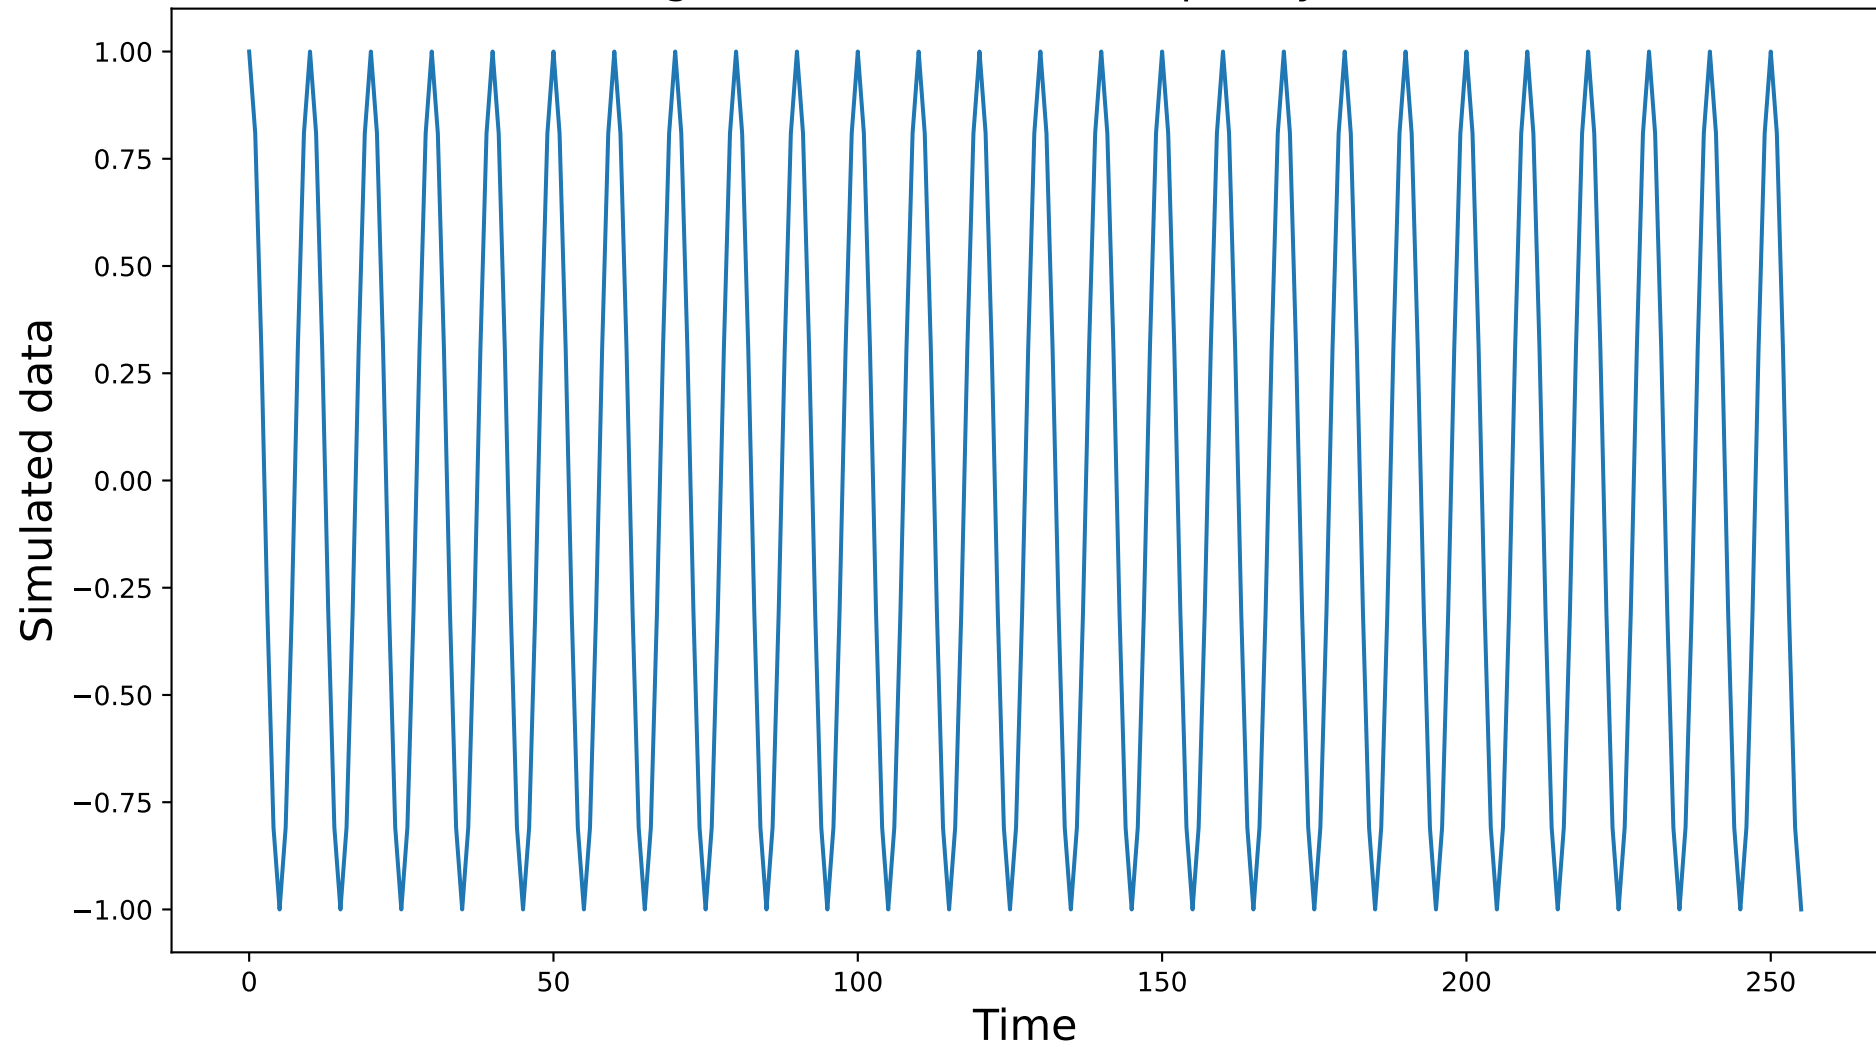

Supplement: supplementary_material [file attachment]

**Skin temperature for ID = 4, LPA\_Slide**

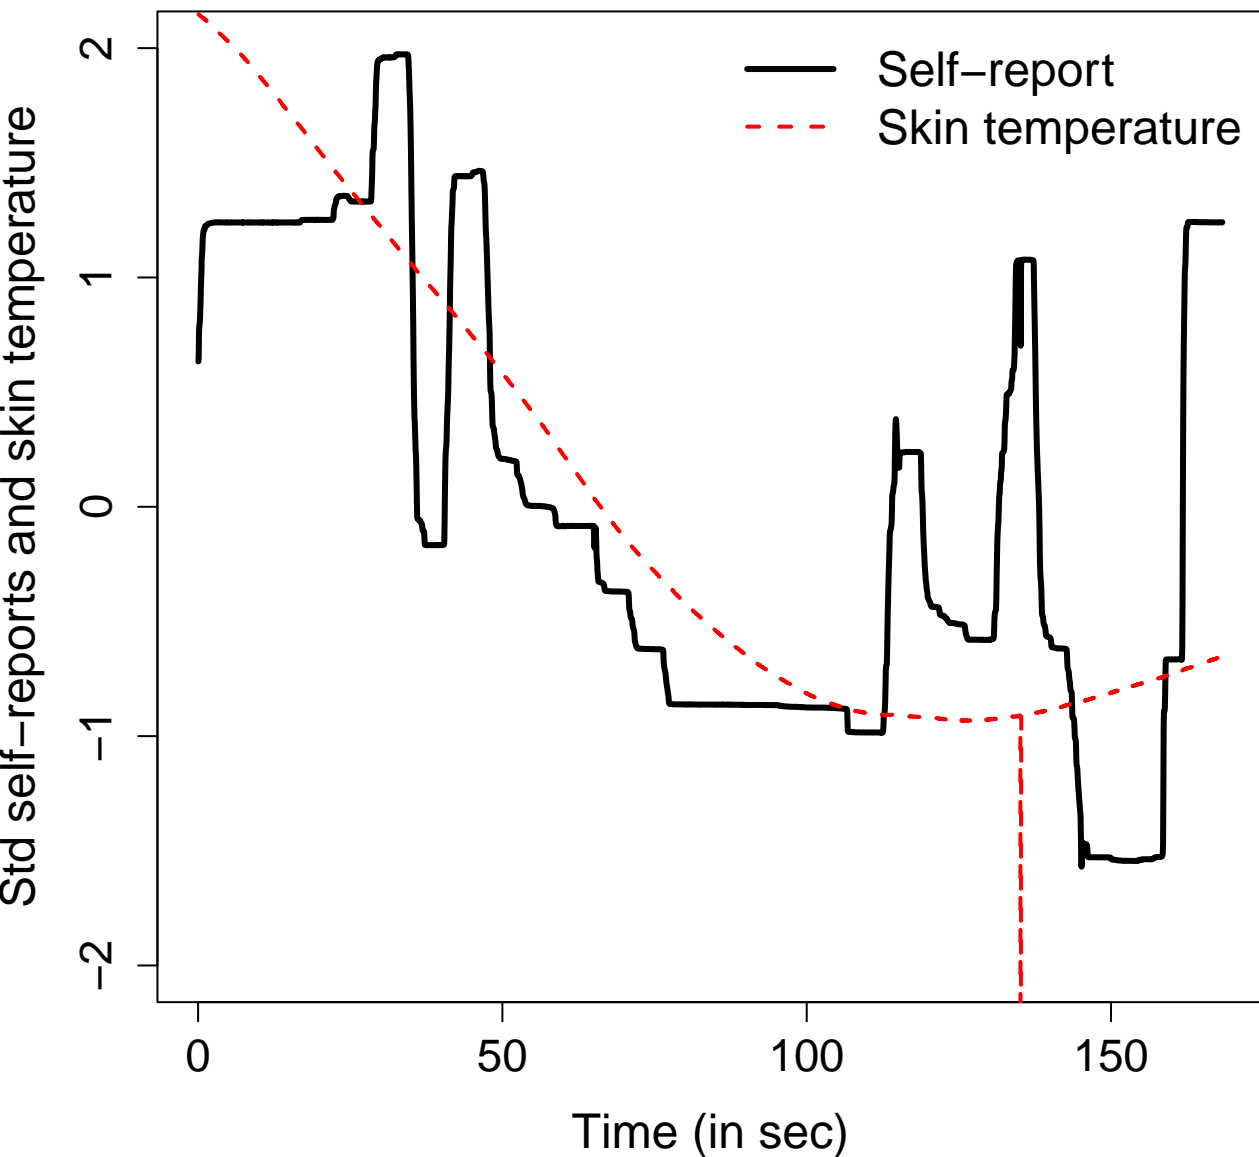

Supplement: supplementary_material [file attachment]

Training Sample 15: Observed vs Predicted

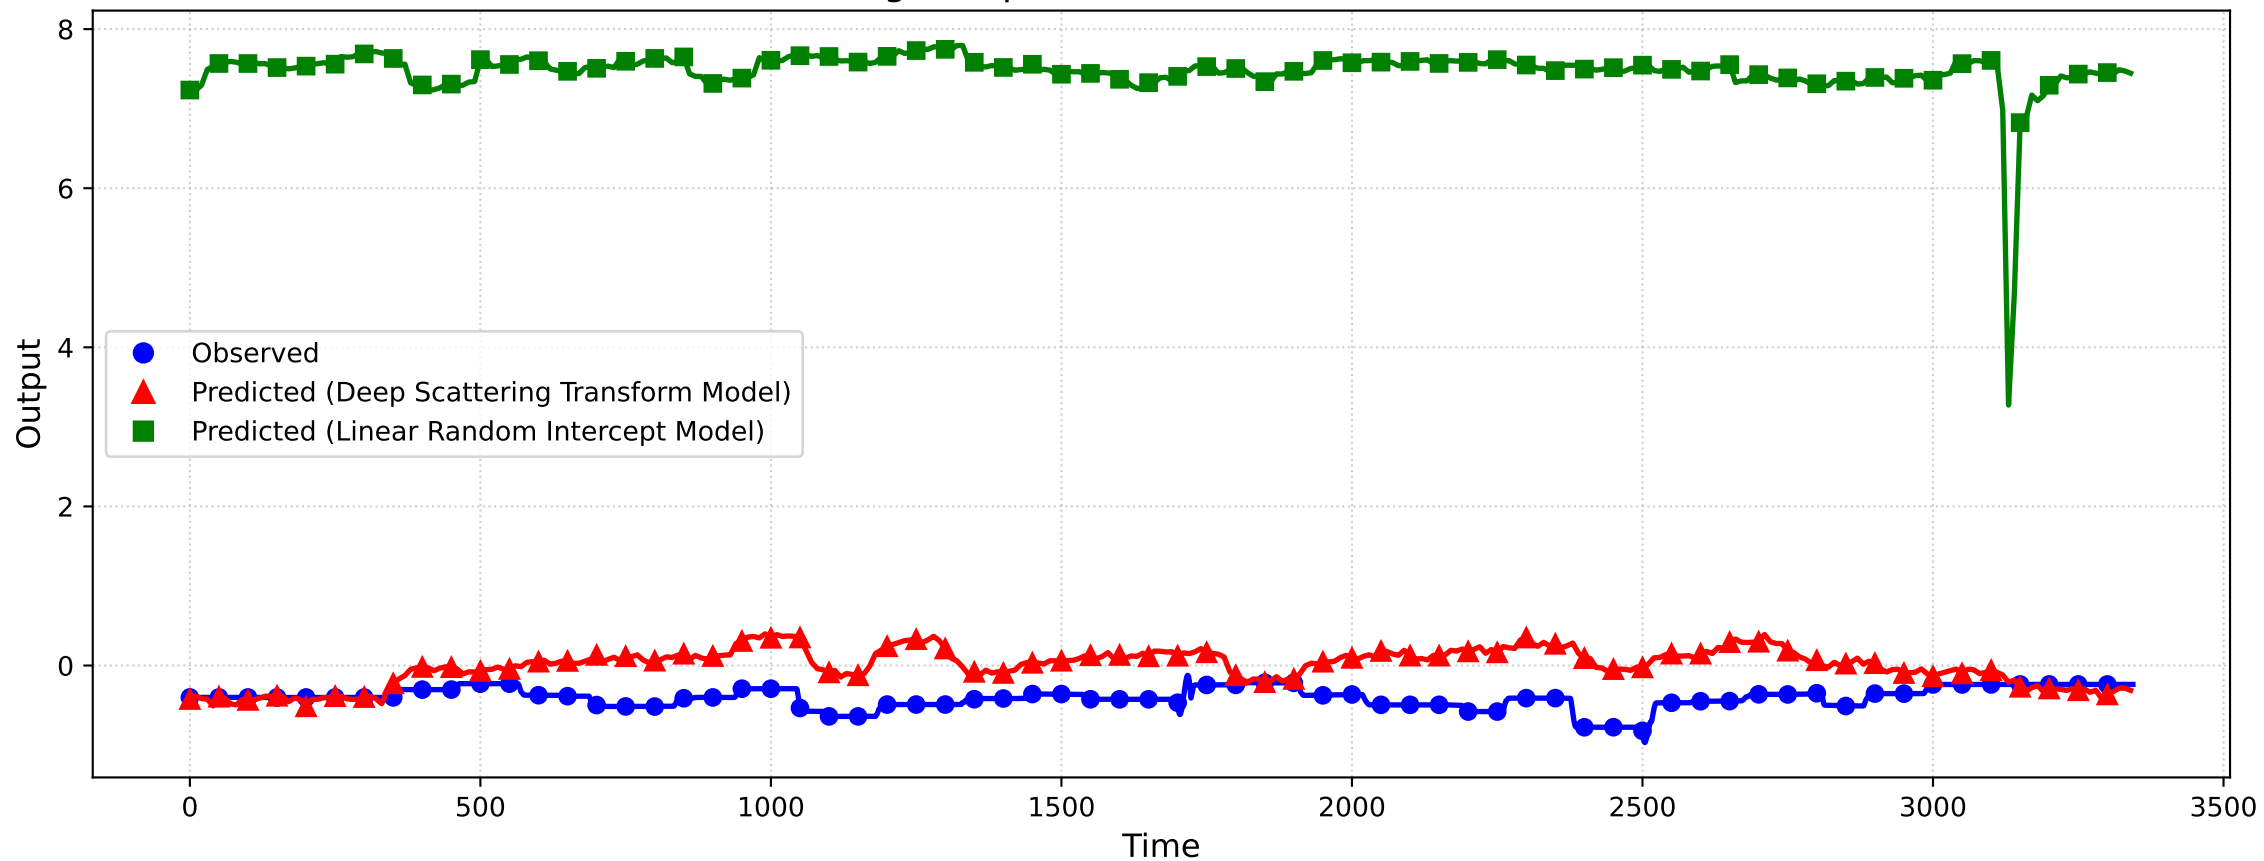

Test Sample 15: Observed vs Predicted

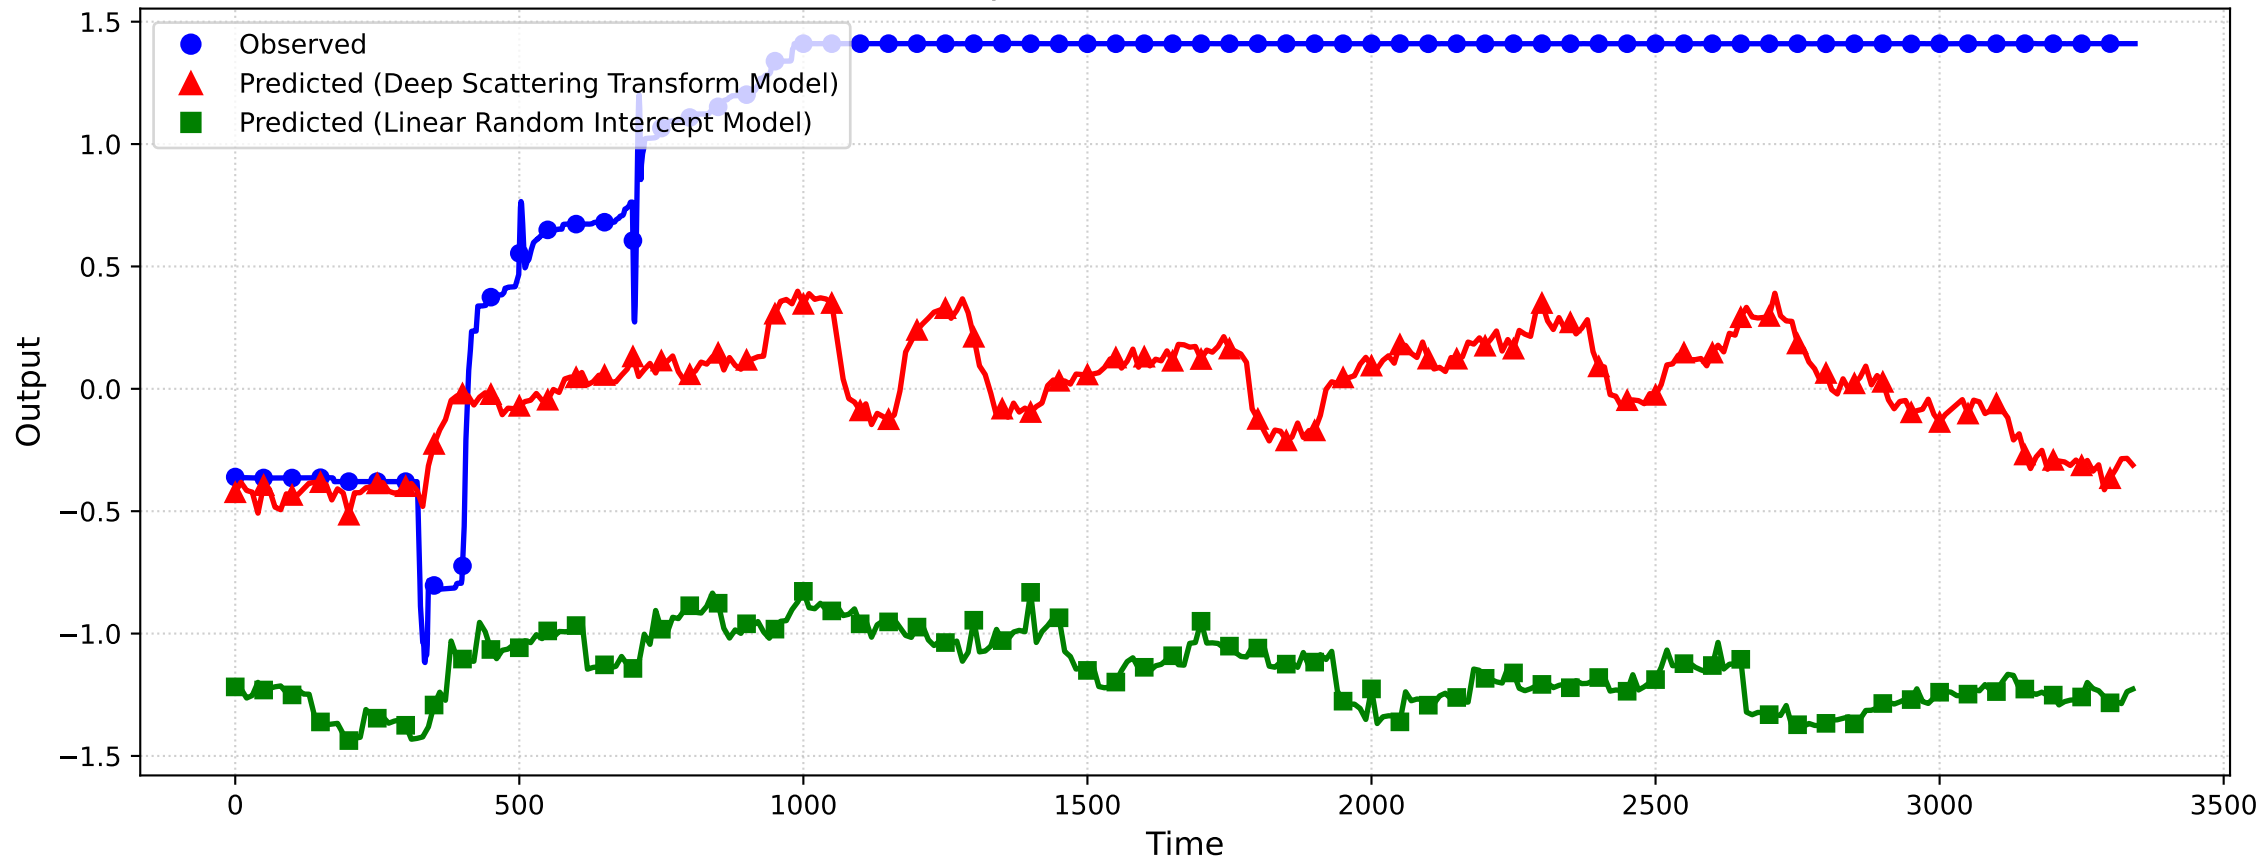

Supplement: supplementary_material [file attachment]

(B) Scattering Activation Map

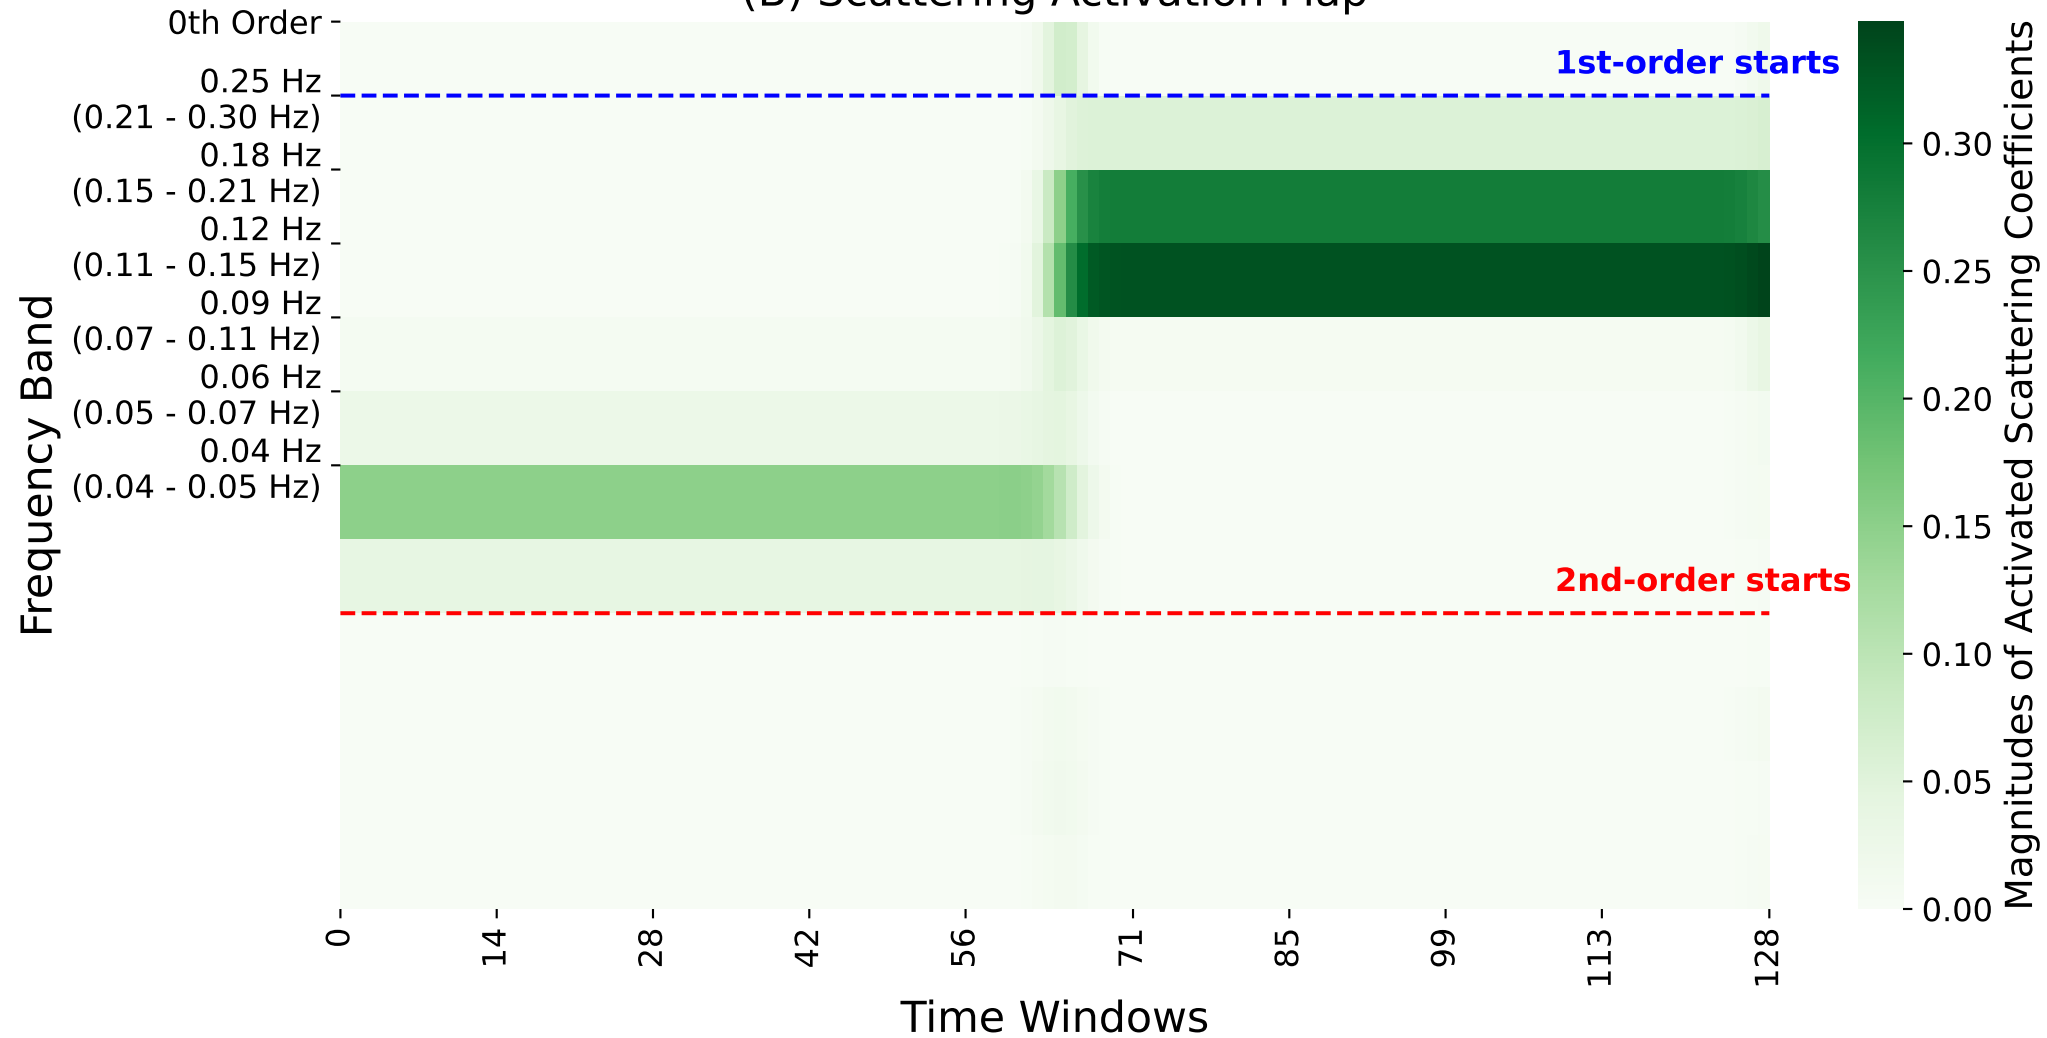

Supplement: supplementary_material [file attachment]

Last 4 Features for Sample 0

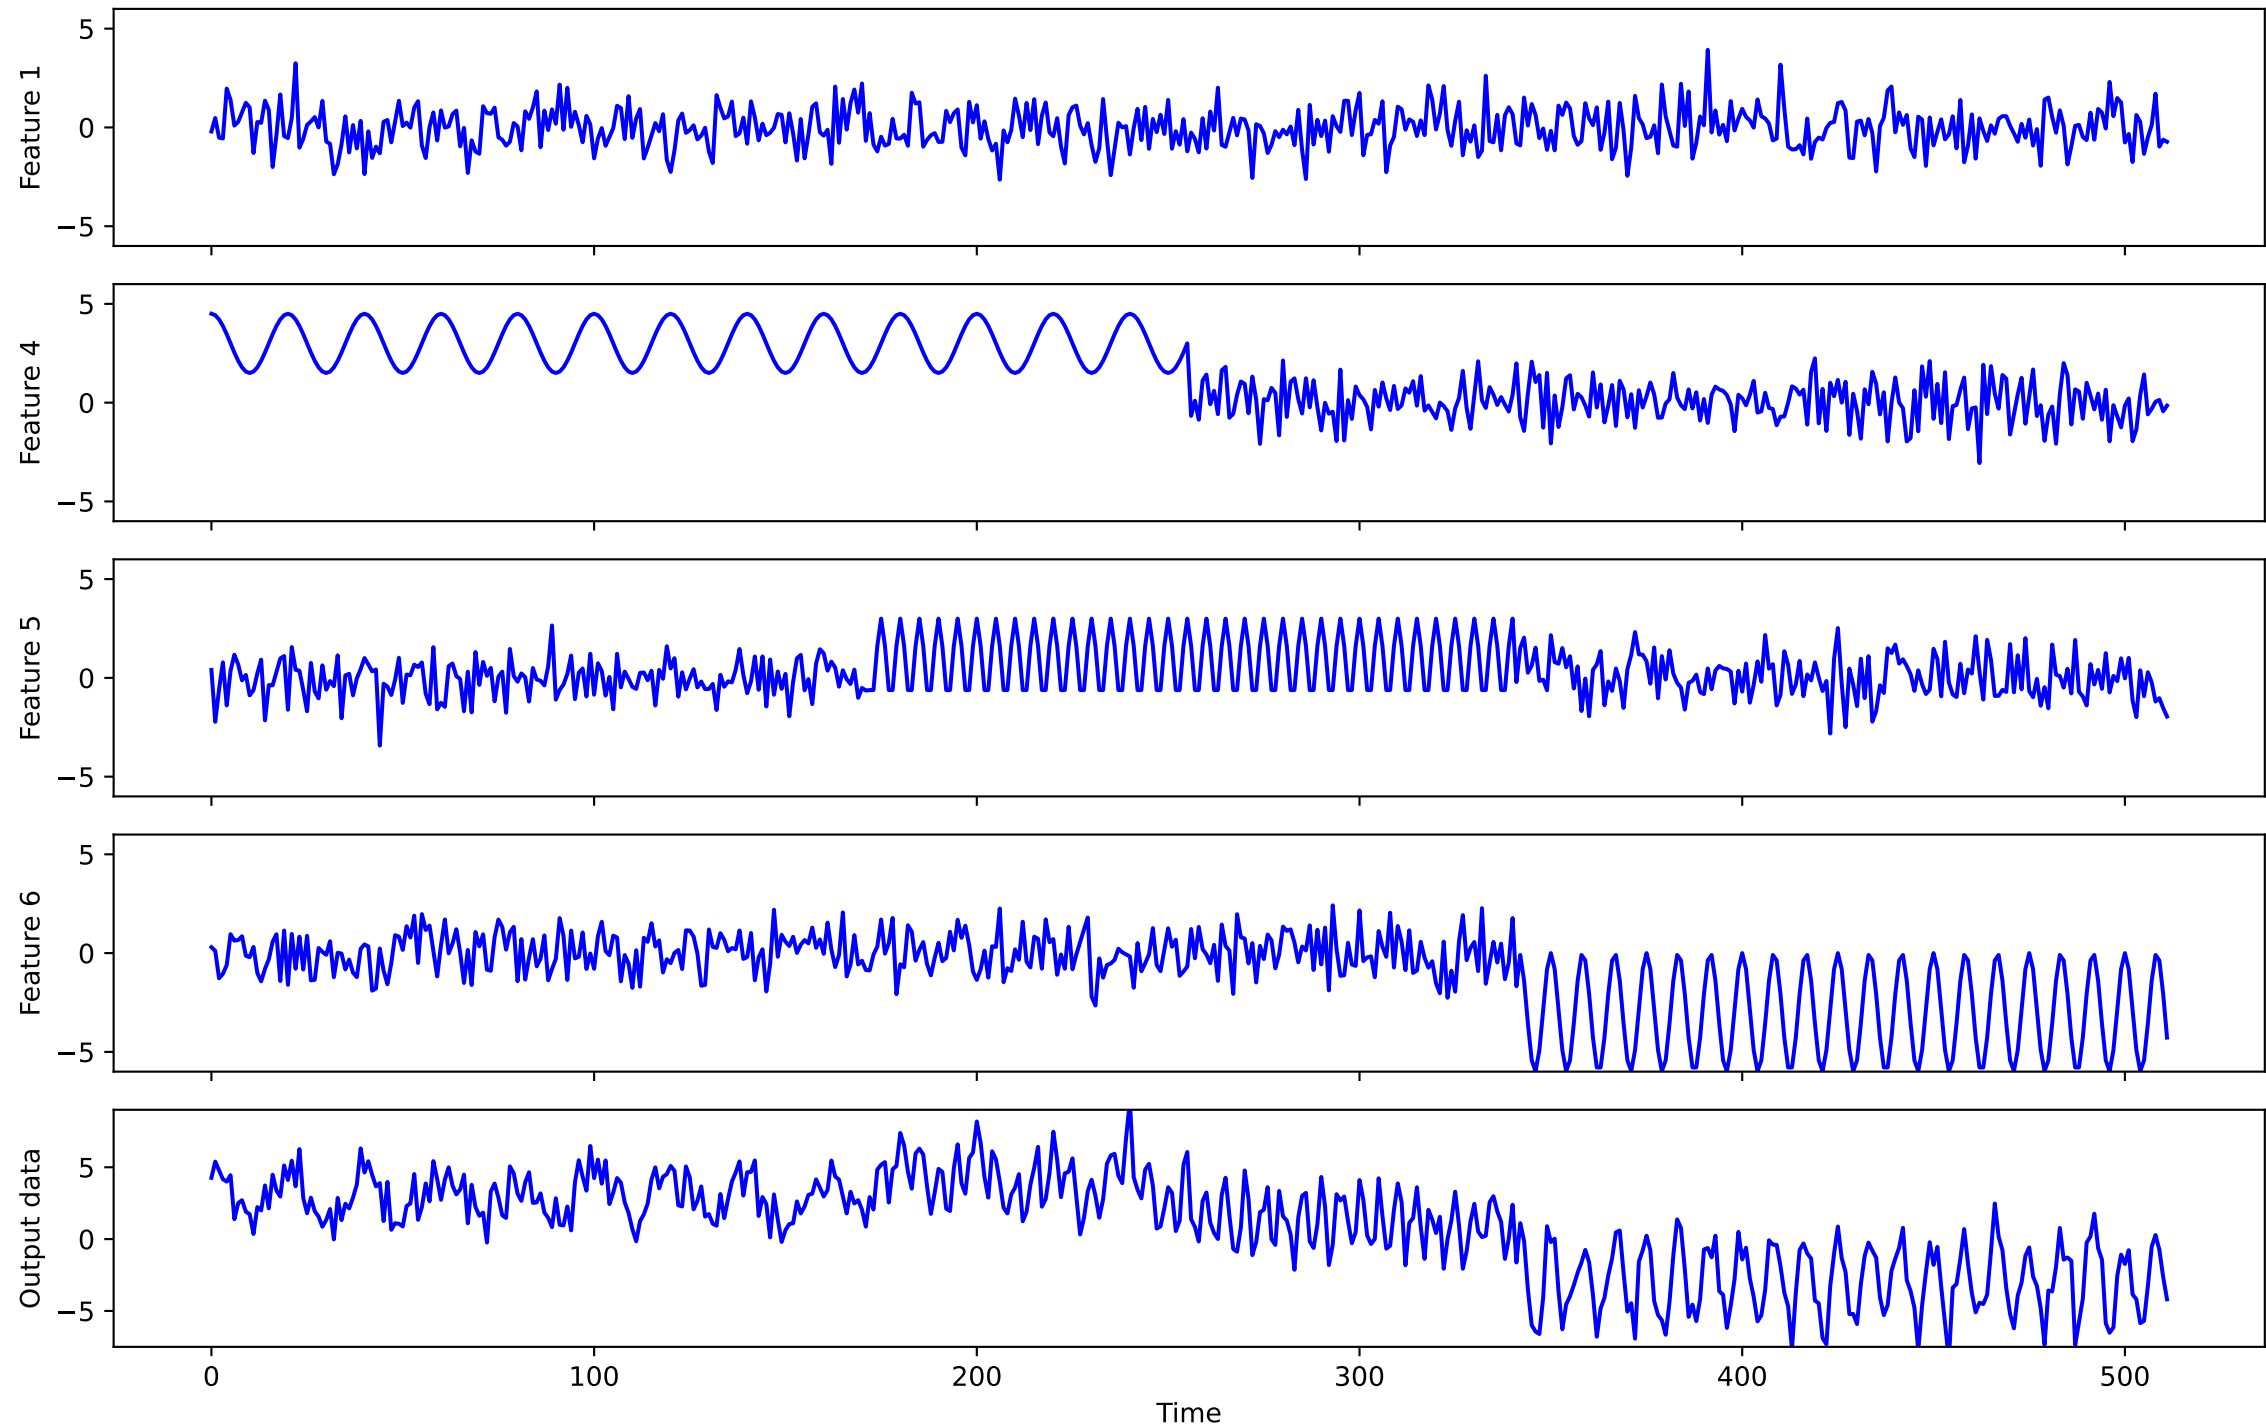

Supplement: supplementary_material [file attachment]

## Slide valence for ID = 21, LPA\_Slide

Std self-report and slide valence values

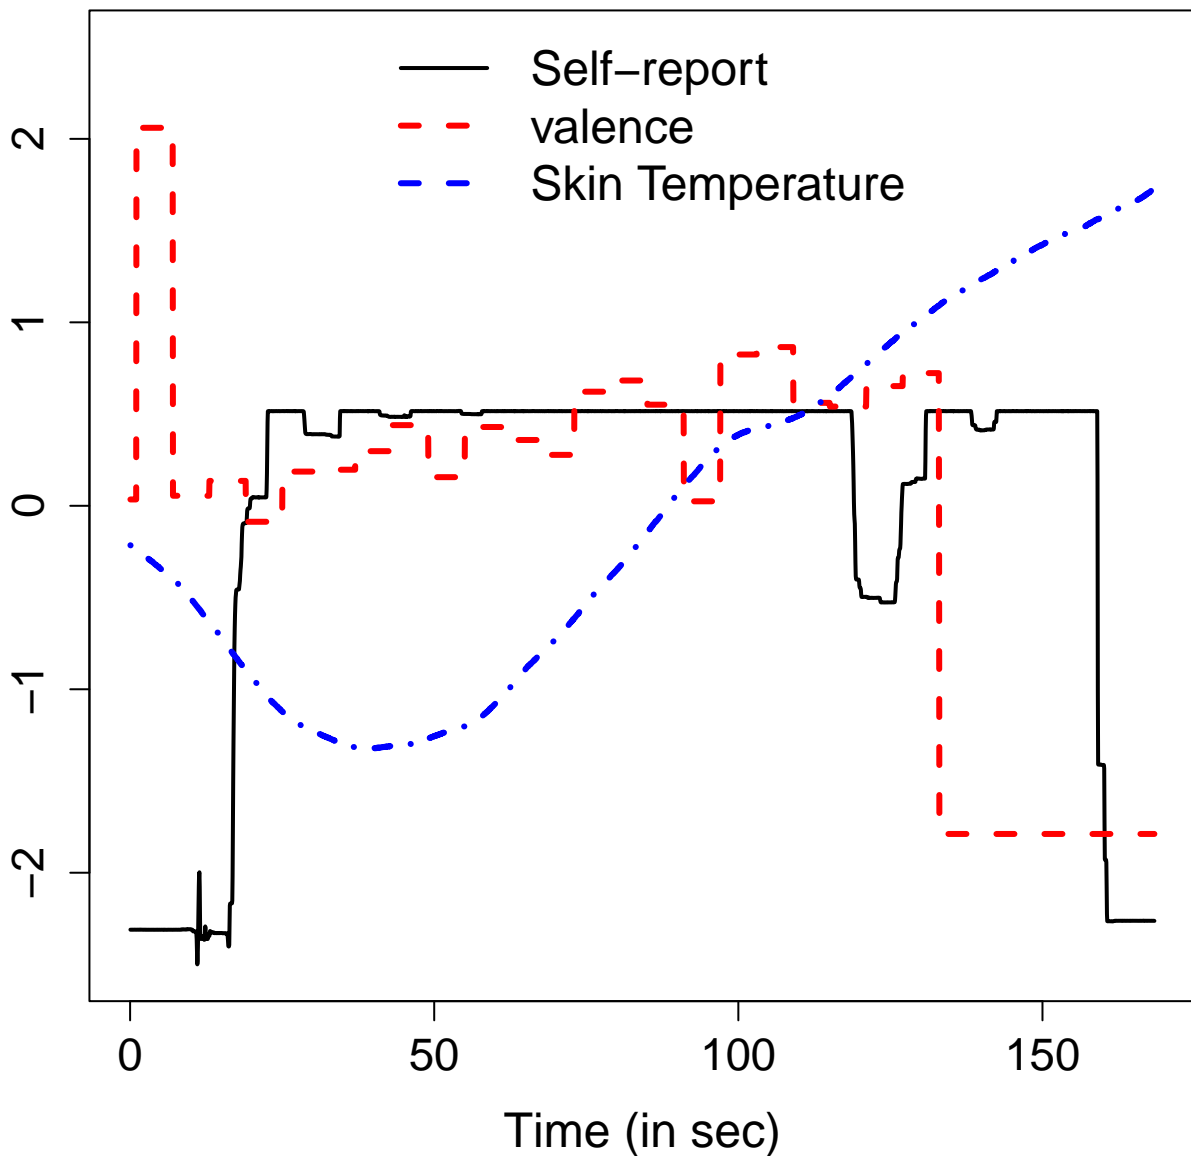

Supplement: supplementary_material [file attachment]

## Zygomaticus activities for ID = 21, LPA\_Slide

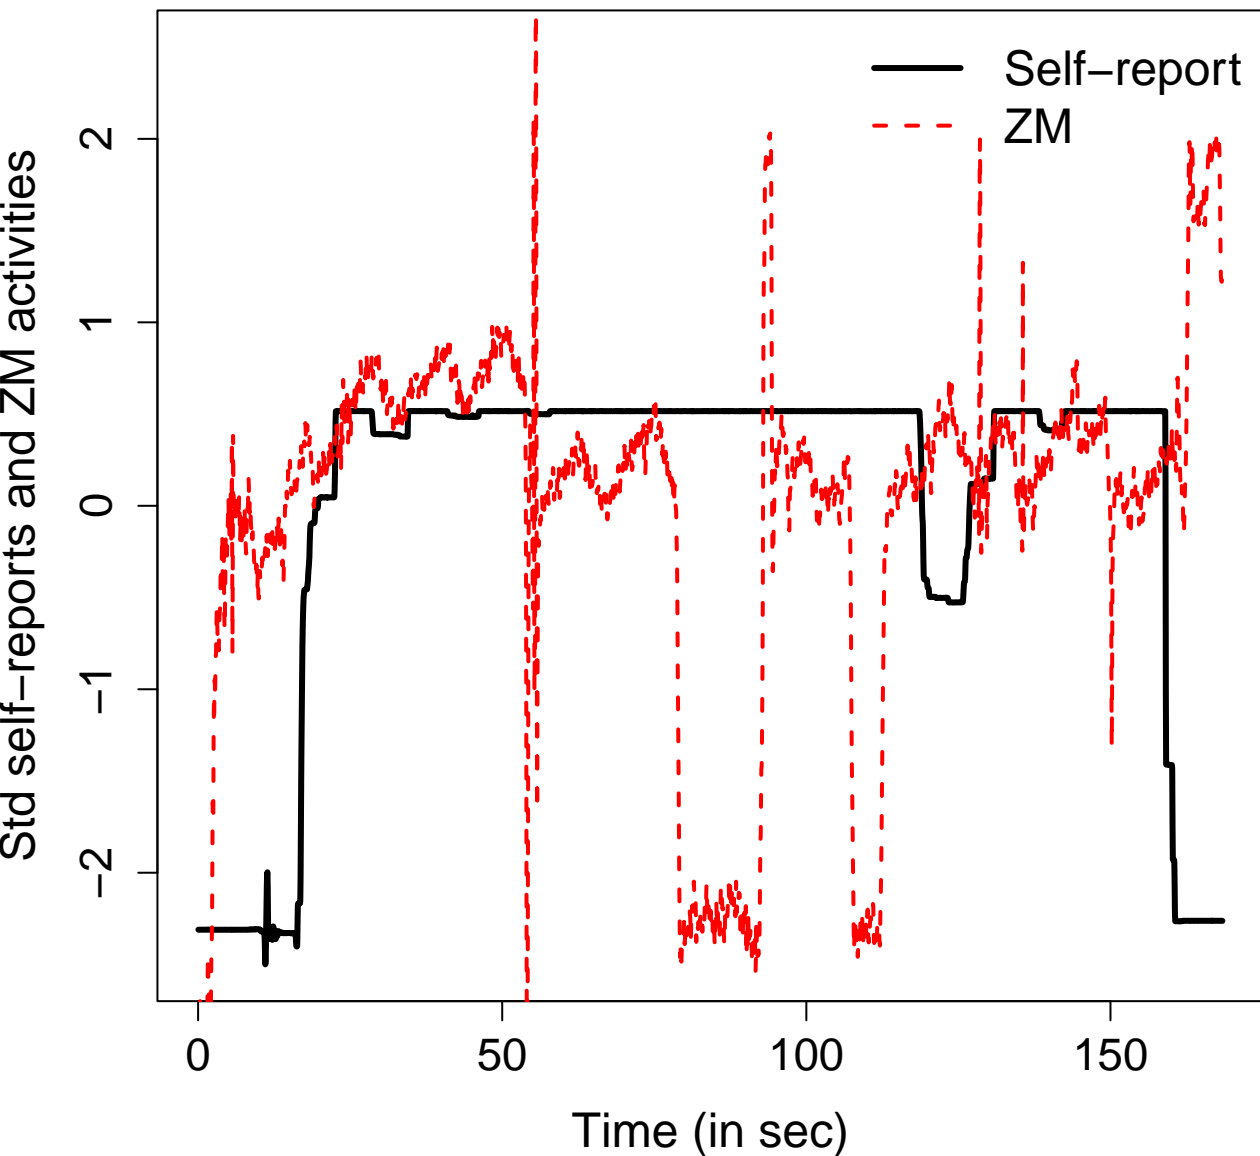

Supplement: supplementary_material [file attachment]

# Subject 21

Features

CS.int  
ECG.RR  
EDA  
ZM.int  
arousal  
heartRate  
skinTemp  
valence

0 11 22 33 44 55 66 77 88 99 110 121 132 143 154 165 176 187 198 209

Time



Supplement: supplementary_material [file attachment]

### (C) Sample Feature Importance

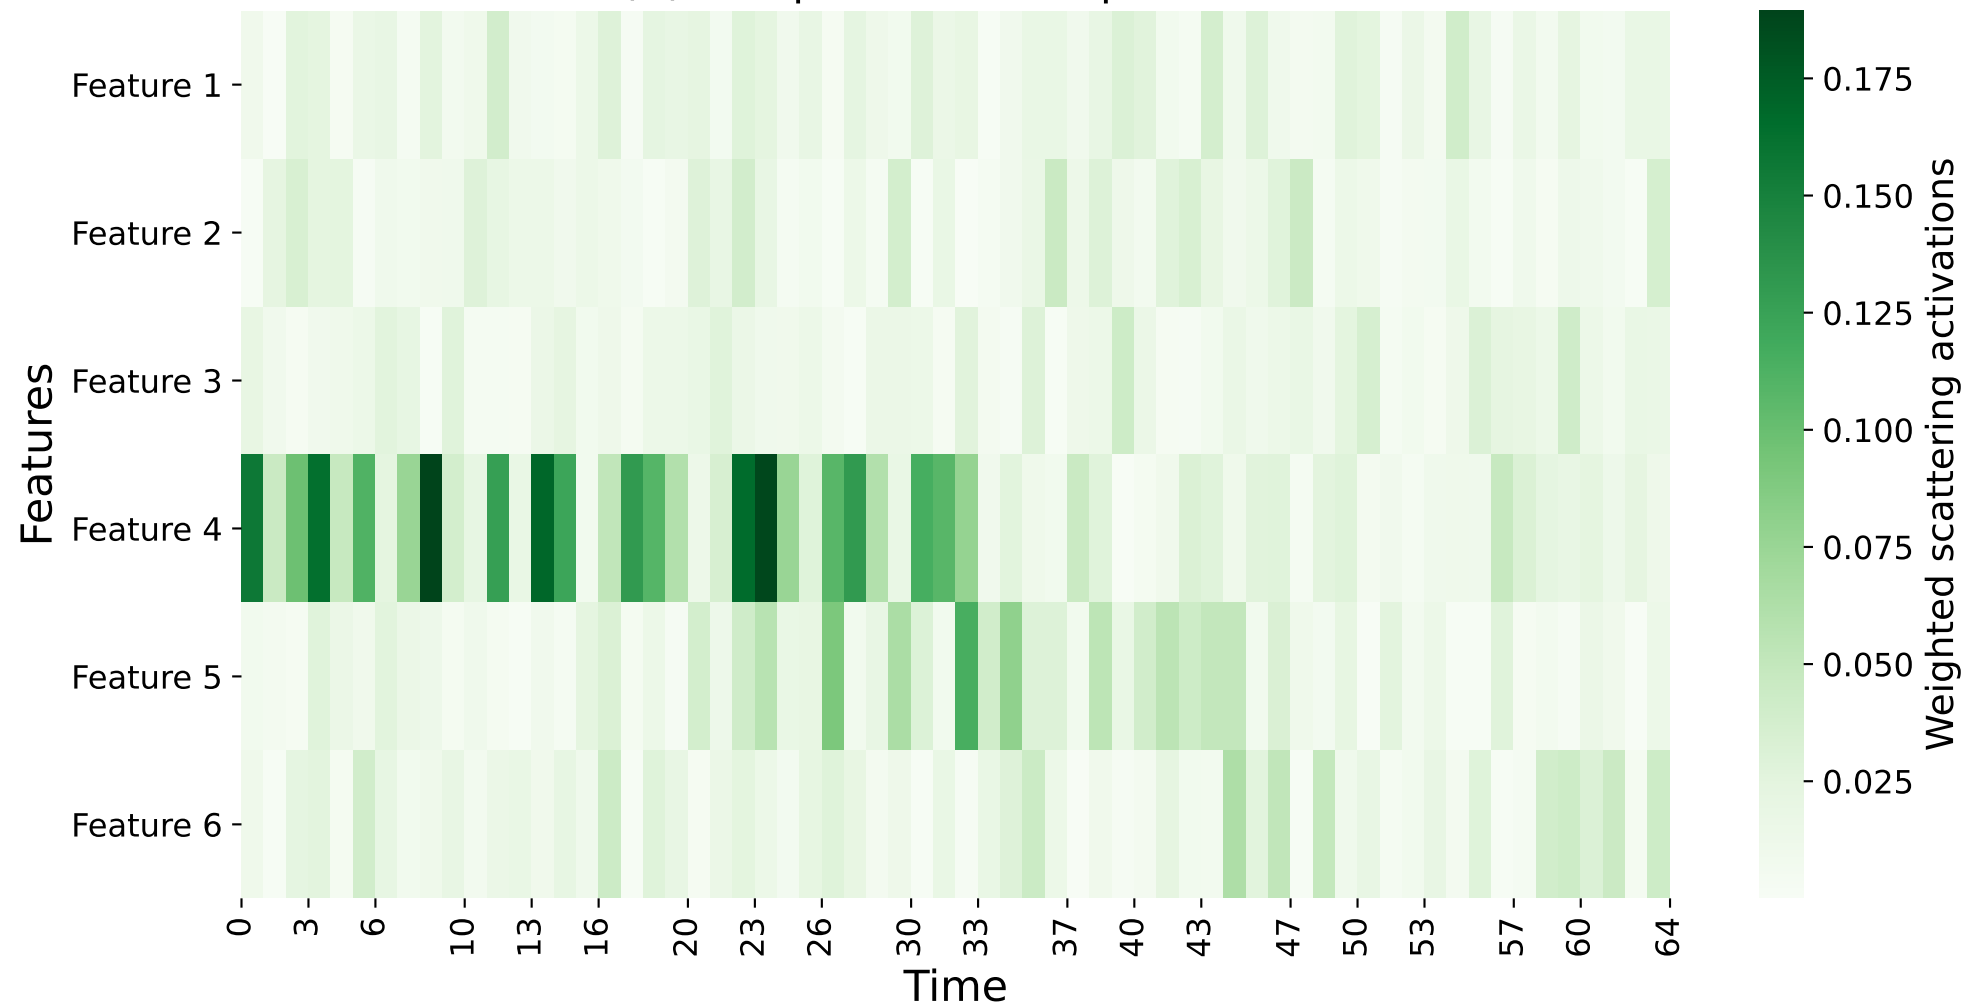

Supplement: supplementary_material [file attachment]

Training Sample 4: Observed vs Predicted

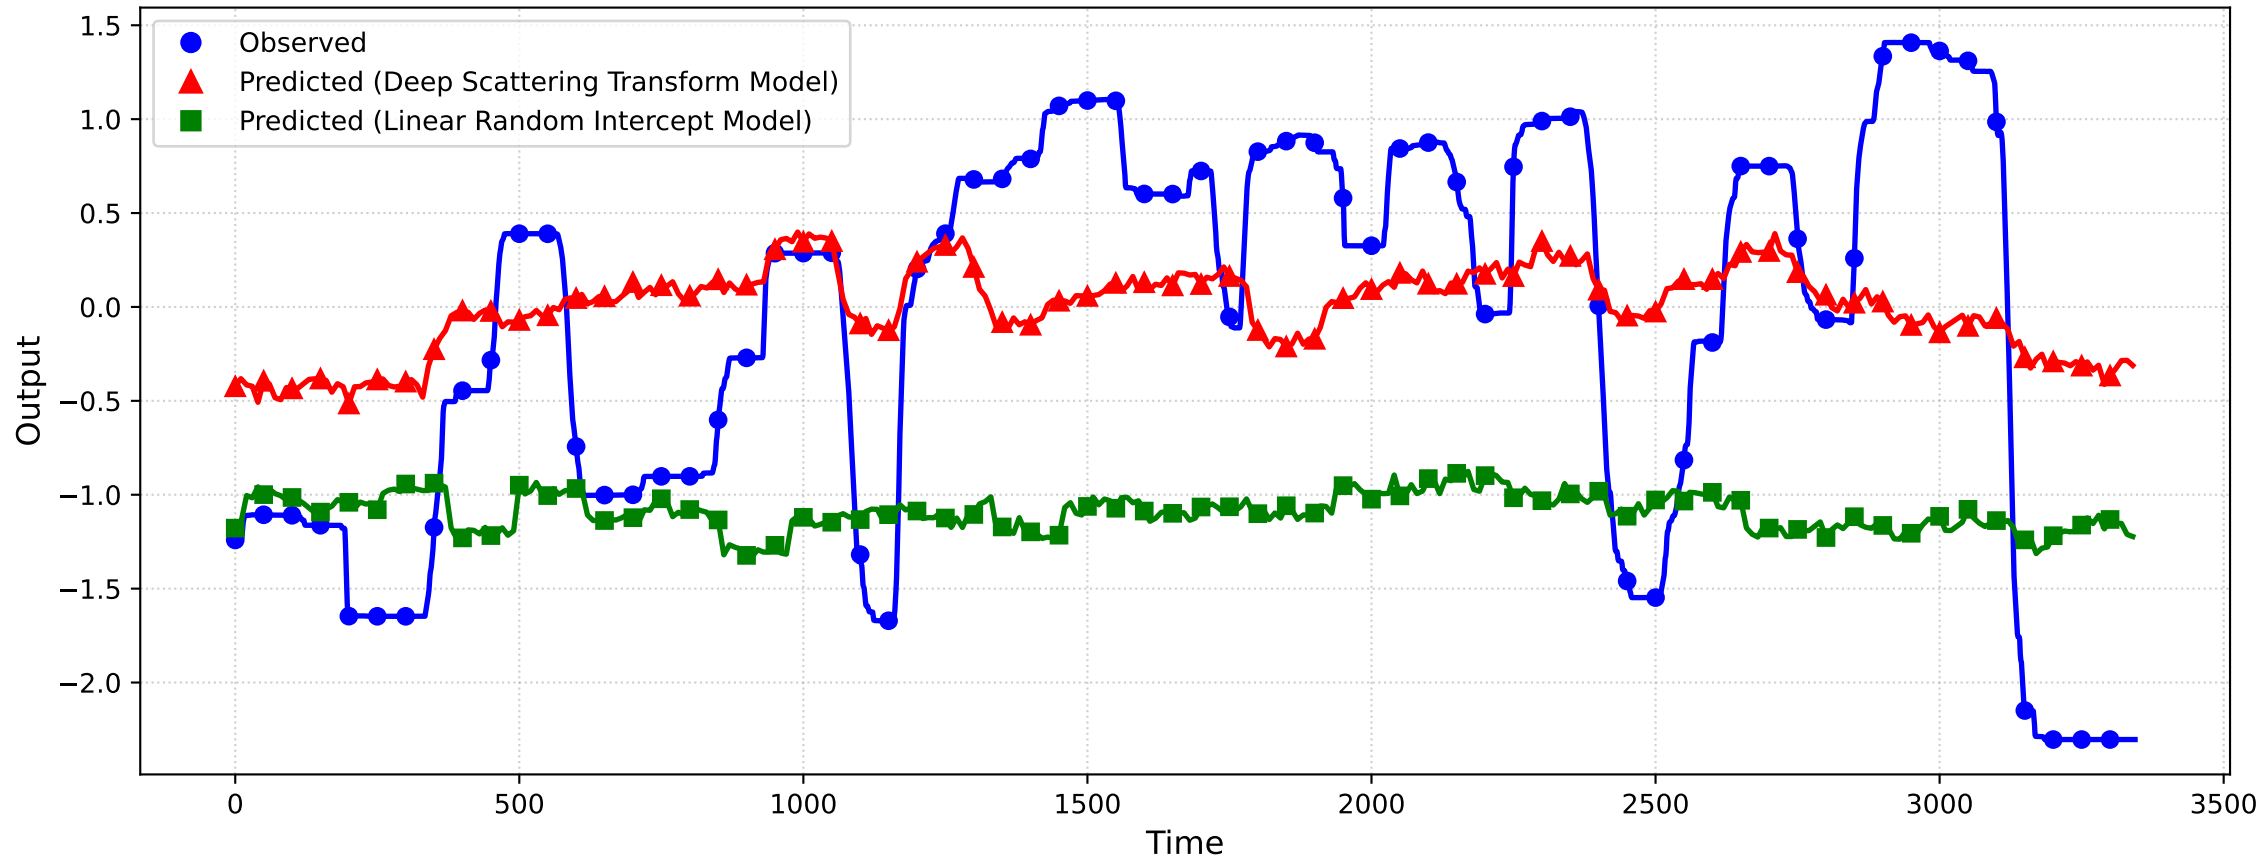

Test Sample 4: Observed vs Predicted

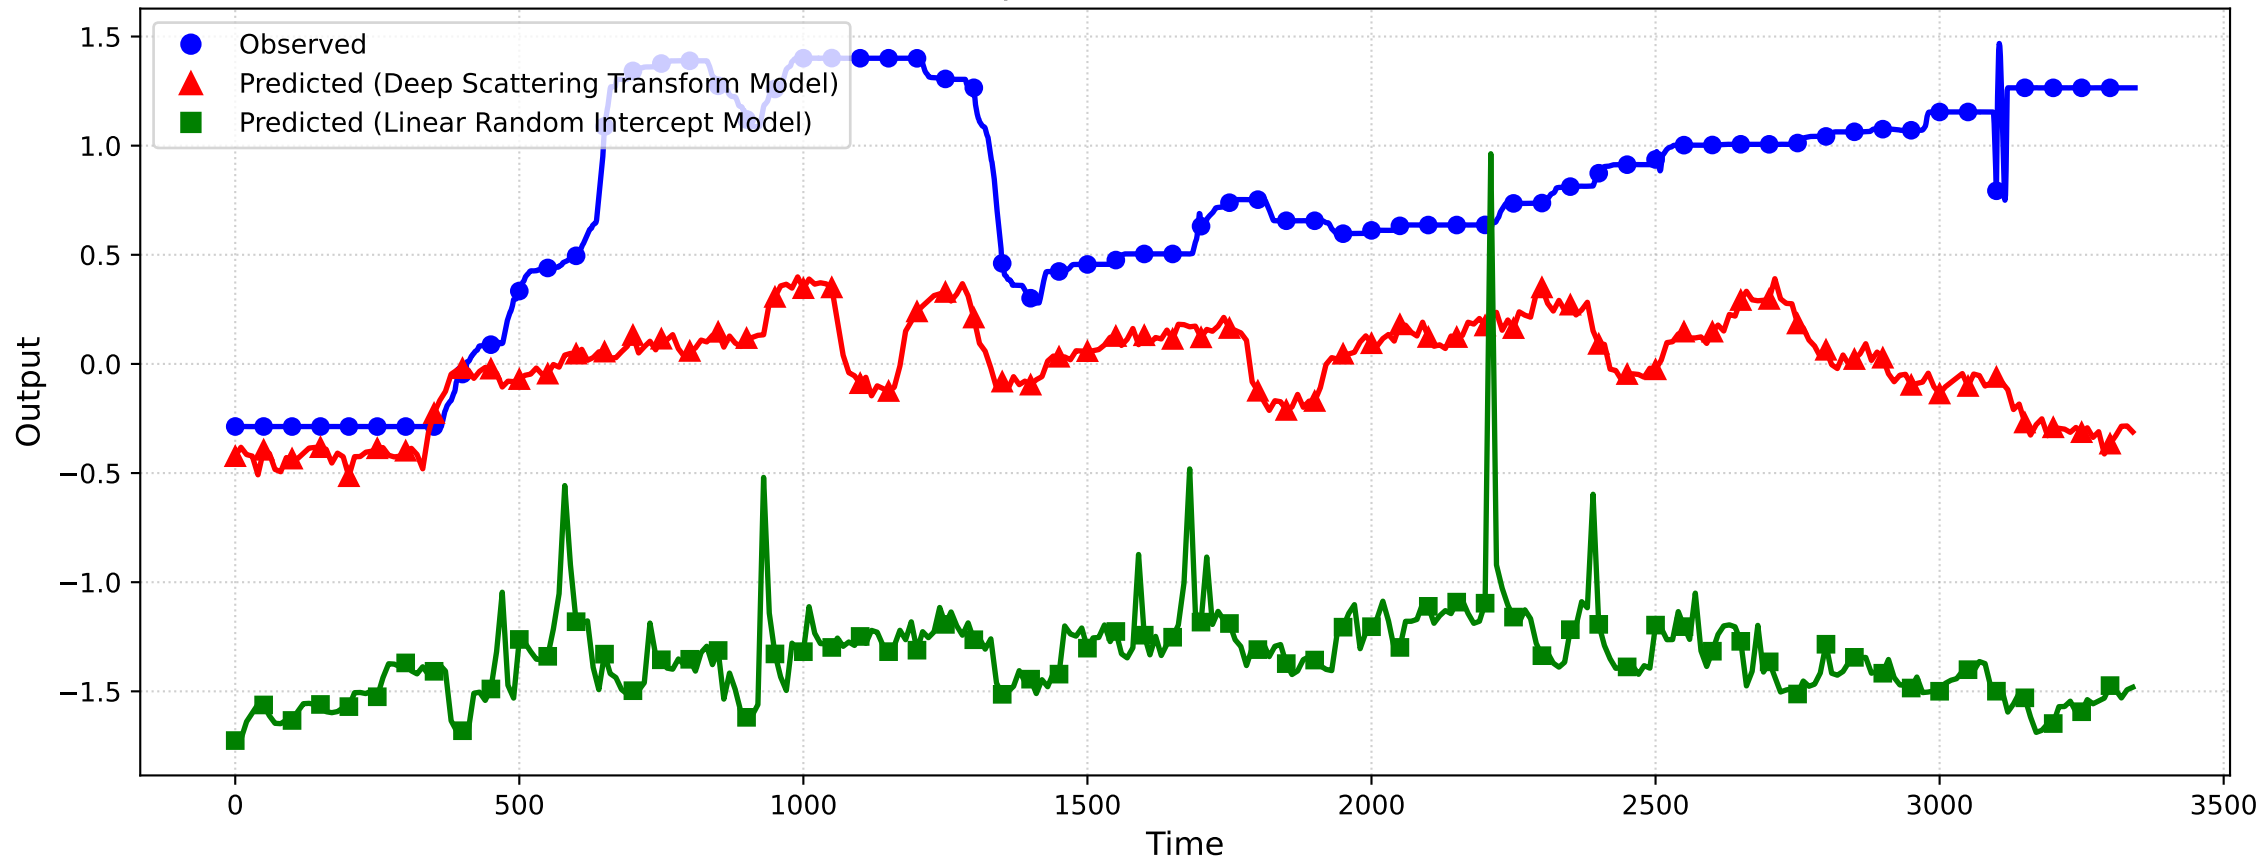

Supplement: supplementary_material [file attachment]

### (A) Scattering activations by frequency band & feature

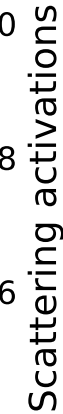

Supplement: supplementary_material [file attachment]

(B) Max scattering activations across frequency bands by feature

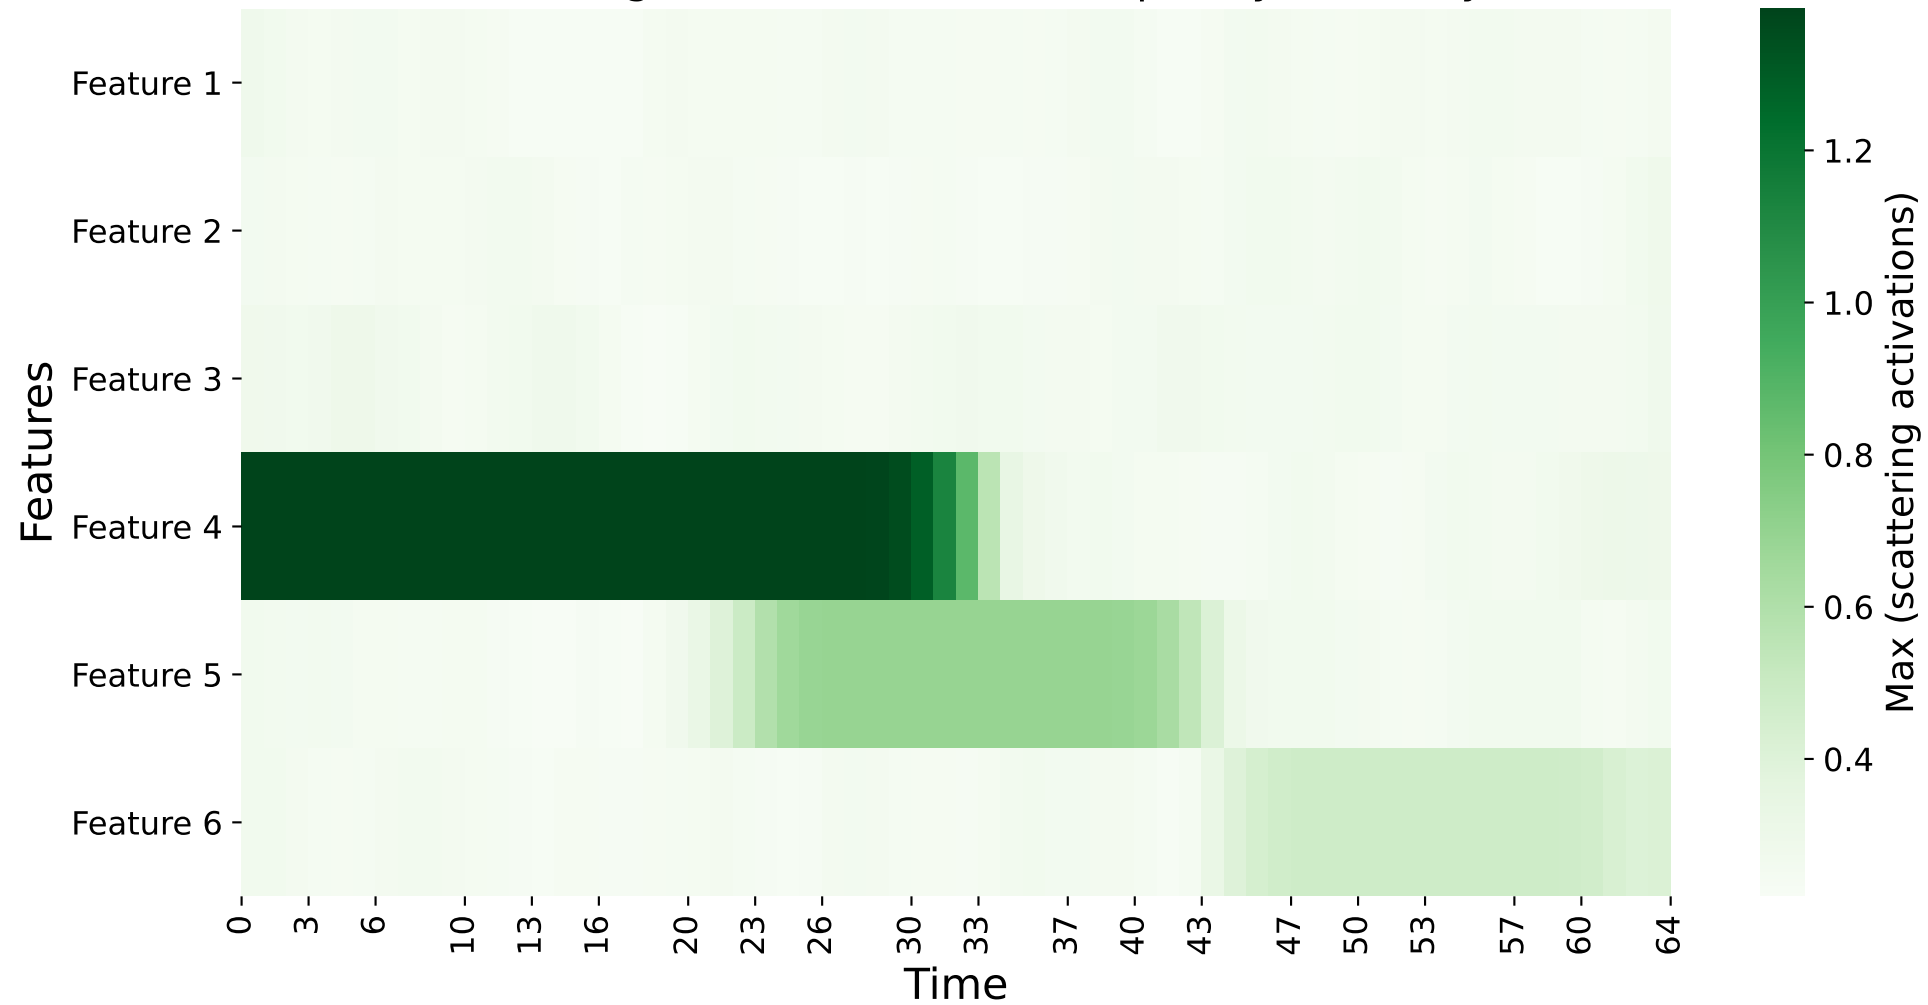

Supplement: supplementary_material [file attachment]
